# Supplementary material for: Synthesizing carbonyl furan derivatives by a dehydrogenative coupling reaction
Source: Royal Society of Chemistry journal article supplement (doi:10.1039/d2ob01130a), 2022-01-01
Supplement: d2ob01130a1.pdf [file d2ob01130a1.pdf]

## Supporting Information

### Synthesizing Carbonyl Furan Derivatives by Dehydrogenatively Coupling Furfuryl Alcohol with Carbonyl Compounds

Xinyan Li,<sup>a</sup> Xiulan Shao,<sup>b</sup> Xiaoyu Zhang,<sup>a</sup> Qiaoyue Zhao,<sup>a</sup> Hongtao Lai,<sup>a</sup> Bing Cui,<sup>a</sup>  
Zihui Shao,<sup>\*a</sup> and Mingqin Zhao<sup>\*a</sup>

<sup>a</sup> Flavors and Fragrance Engineering & Technology Research Center of Henan Province, College of Tobacco Science, Henan Agricultural University, Zhengzhou 450000, China.

<sup>b</sup> Xi'an Urban Drainage Monitoring Station, Xi'an 710016, China.

## Table of Contents

|                                                                                                  |           |
|--------------------------------------------------------------------------------------------------|-----------|
| <b>General Considerations .....</b>                                                              | <b>3</b>  |
| <b>General Procedures for the Optimization of Reaction Conditions.....</b>                       | <b>4</b>  |
| <b>General Experimental Procedures for the Synthesis of Carbonyl<br/>Furan Derivatives .....</b> | <b>5</b>  |
| <b>Characterization Data of Products .....</b>                                                   | <b>6</b>  |
| <b>Reference .....</b>                                                                           | <b>14</b> |

## General Considerations

The synthesis of ligands and preparation of catalysts in this work were reported in our previous publication<sup>[1]</sup>. Air and moisture sensitive reactions were carried out in glovebox or in over-dried glassware sealed with rubber septa using standard schlenk techniques. Most solvents used were dried over solvent purification system (Innovative Technology PS-MD-5) and alcohol solvents were dried over calcium hydride. Deuterated solvents were purchased from Cambridge Isotope Laboratories, vented and distilled over calcium hydride. All chemicals were purchased from commercial sources with purity over 95% and used without further purification. NMR spectra were received using a Bruker 400 MHz spectrometer. Chemical shifts are reported in ppm relative to the deuterated solvent. GC analysis were carried out on SHIMADAZU GC 2010 PLUS system. (Column: SH-Rtx-200, 30 m x 0.25 mm x 0.25  $\mu$ m). GC/MS analyses were carried out on an GC-MS-QP2010 SE W system equipped with aSH-Rxi-5Sil MS 30 meter, 0.25 mmID, 0.25  $\mu$ m df. High resolution exact mass measurements (HRMS) were performed on Thermo SCIENTIFIC Q EXACTIVE.

## General Procedures for the Optimization of Reaction Conditions

All dehydrogenation experiments were carried out in a 25 mL pressure seal tube. In the argon atmosphere glovebox, furfuryl alcohol **1a** (0.5 mmol), 2-methyl-3-pentanone **2a**, manganese catalysts (0.005 mmol, 1 mol%), base (0.0125–0.0250 mmol, 2.5–5.0 mol%) solvent (0.5–0.8 mL) were added sequentially to the seal tube equipped with a magnetic stir bar, The reaction mixture was stirred at given temperature for 16 hours and cooled to room temperature. After the gas was released, the yield of product **3a** was determined by GC with biphenyl as the internal standard.

**Table S1. Optimization of Reaction Conditions.**

| Entry           | [Mn]                   | Base                            | Solvent | n [mL] | x [mol%] | T [°C] | Y <sub>3a</sub> [%] |
|-----------------|------------------------|---------------------------------|---------|--------|----------|--------|---------------------|
| 1               | [Mn]-I                 | Cs <sub>2</sub> CO <sub>3</sub> | Toluene | 0.5    | 2.5      | 140    | 77                  |
| 2               | [Mn]-II                | Cs <sub>2</sub> CO <sub>3</sub> | Toluene | 0.5    | 2.5      | 140    | 70                  |
| 3               | [Mn]-III               | Cs <sub>2</sub> CO <sub>3</sub> | Toluene | 0.5    | 2.5      | 140    | 65                  |
| 4               | Mn(CO) <sub>5</sub> Br | Cs <sub>2</sub> CO <sub>3</sub> | Toluene | 0.5    | 2.5      | 140    | NP                  |
| 5               | MnCl <sub>2</sub>      | Cs <sub>2</sub> CO <sub>3</sub> | Toluene | 0.5    | 2.5      | 140    | NP                  |
| 6               | none                   | Cs <sub>2</sub> CO <sub>3</sub> | Toluene | 0.5    | 2.5      | 140    | NP                  |
| 7               | [Mn]-I                 | Cs <sub>2</sub> CO <sub>3</sub> | dioxane | 0.5    | 2.5      | 165    | 24                  |
| 8               | [Mn]-I                 | Cs <sub>2</sub> CO <sub>3</sub> | THF     | 0.5    | 2.5      | 140    | <5                  |
| 9               | [Mn]-I                 | KOH                             | Toluene | 0.5    | 2.5      | 140    | 32                  |
| 10              | [Mn]-I                 | <sup>t</sup> BuOK               | Toluene | 0.5    | 2.5      | 165    | 45                  |
| 11              | [Mn]-I                 | Na <sub>2</sub> CO <sub>3</sub> | Toluene | 0.5    | 2.5      | 140    | 15                  |
| 12              | [Mn]-I                 | K <sub>2</sub> CO <sub>3</sub>  | Toluene | 0.5    | 2.5      | 140    | <5                  |
| 13              | [Mn]-I                 | Cs <sub>2</sub> CO <sub>3</sub> | Toluene | 0.5    | 5.0      | 140    | 75                  |
| 14              | [Mn]-I                 | Cs <sub>2</sub> CO <sub>3</sub> | Toluene | 0.8    | 2.5      | 140    | 47                  |
| 15 <sup>b</sup> | [Mn]-I                 | Cs <sub>2</sub> CO <sub>3</sub> | Toluene | 0.5    | 2.5      | 140    | 31                  |
| 16 <sup>c</sup> | [Mn]-I                 | Cs <sub>2</sub> CO <sub>3</sub> | Toluene | 0.5    | 2.5      | 140    | 51                  |
| 17 <sup>d</sup> | [Mn]-I                 | Cs <sub>2</sub> CO <sub>3</sub> | Toluene | 0.5    | 2.5      | 140    | 77                  |

<sup>a</sup> Unless otherwise specified, reactions were performed on a 0.5 mmol scale of furfuryl alcohol **1a**, 1.0 mmol 2-methyl-3-pentanone **2a**, using 2.5 mol% of base, 1 mol% of Mn-precatalyst, in 0.5 mL toluene at 140 °C for 16 h. The yields were determined by GC using biphenyl as the internal standard. <sup>b</sup> 0.6 mmol **2a** was used. <sup>c</sup> 0.8 mmol **2a** was used. <sup>d</sup> 1.5 mmol **2a** was used.

# General Experimental Procedures for the Synthesis of Carbonyl Furan Derivatives

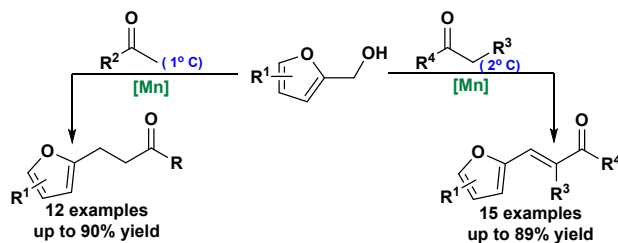

All experiments were carried out in a 25 mL pressure seal tube. In the argon atmosphere glovebox, furfuryl alcohol (0.5 mmol), carbonyl compounds (1.0 mmol), **[Mn]-I** (1 mol%),  $CS_2CO_3$  (2.5 mol%), toluene (0.5 mL) were added sequentially to the seal tube equipped with a magnetic stir bar. The reaction mixture was stirred at given temperature for 16 hours and cooled to room temperature. After the gas was released, the yield of products were purified through column chromatography.

## Characterization Data of Products

### 1-(furan-2-yl)-2,4-dimethylpent-1-en-3-one **3a**

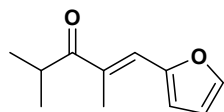

The yield of product was isolated through column chromatography (PE/EA=4:1) on silica gel as colourless oil (66.8mg, 0.38mmol, 75%). <sup>1</sup>H NMR (400 MHz, CDCl<sub>3</sub>) δ 7.49 (d, J = 1.5 Hz, 1H), 7.24 (s, 1H), 6.61 (d, J = 3.5 Hz, 1H), 6.46 (dd, J = 3.4, 1.8 Hz, 1H), 3.35 (dt, J = 13.6, 6.8 Hz, 1H), 2.08 (s, 3H), 1.08 (d, J = 6.8 Hz, 6H). <sup>13</sup>C NMR (101 MHz, CDCl<sub>3</sub>) δ 205.77 (s), 152.01 (s), 144.18 (s), 132.78 (s), 125.23 (s), 114.98 (s), 112.33 (s), 33.81 (s), 19.74 (s), 13.42 (s). HRMS (EI) calcd. for C<sub>11</sub>H<sub>14</sub>O<sub>2</sub> [M]: 178.0994; found: 178.0998.

### 1-cyclohexyl-3-(furan-2-yl)-2-methylprop-2-en-1-one **3c**

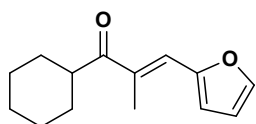

The yield of product was isolated through column chromatography (PE/EA=4:1) on silica gel as colourless oil (97.1mg, 0.44mmol, 89%). <sup>1</sup>H NMR (400 MHz, CDCl<sub>3</sub>) δ 7.49 (d, J = 1.6 Hz, 1H), 7.22 (s, 1H), 6.61 (d, J = 3.4 Hz, 1H), 6.46 (dd, J = 3.4, 1.8 Hz, 1H), 3.03 (tt, J = 10.6, 2.7 Hz, 1H), 2.06 (s, 3H), 1.73 (dd, J = 19.1, 8.6 Hz, 5H), 1.22 (dt, J = 24.3, 7.0 Hz, 5H). <sup>13</sup>C NMR (101 MHz, CDCl<sub>3</sub>) δ 205.10 (s), 152.04 (s), 144.12 (s), 132.93 (s), 125.05 (s), 114.92 (s), 112.34 (s), 44.33 (s), 29.95 (s), 25.95 (s), 13.40 (s). HRMS (EI) calcd. for C<sub>14</sub>H<sub>18</sub>O<sub>2</sub>[M]: 218.1307; found:218.1304.

### 2-(furan-2-ylmethyl)cyclohexan-1-one **3d**<sup>[2]</sup>

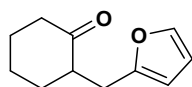

The yield of product was isolated through column chromatography (PE/EA=4:1) on silica gel colourless oil (31.1mg, 0.18mmol, 35%). <sup>1</sup>H NMR (400 MHz, CDCl<sub>3</sub>) δ 7.24 – 7.21 (m, 1H), 6.20 (dd, J = 3.1, 1.9 Hz, 1H), 5.94 (dd, J = 3.1, 0.5 Hz, 1H), 3.10 (dd, J = 15.3, 4.8 Hz, 1H), 2.65 – 2.56 (m, 1H), 2.44 (dd, J = 15.3, 8.5 Hz, 1H), 2.40 – 2.32 (m, 1H), 2.31 – 2.21 (m, 1H), 2.02 (tdd, J = 8.7, 5.8, 2.5 Hz, 2H), 1.82 – 1.75 (m, 1H), 1.62 – 1.53 (m, 2H), 1.34 – 1.24 (m, 1H). <sup>13</sup>C NMR (101 MHz, CDCl<sub>3</sub>) δ 211.94 (s), 154.12 (s), 141.02 (s), 110.20 (s), 106.30 (s), 49.79 (s), 42.11 (s), 33.71 (s), 28.02 (s), 27.81 (s), 25.12 (s).

### 2,6-bis(furan-2-ylmethyl)cyclohexan-1-one **3d**<sup>[3]</sup>

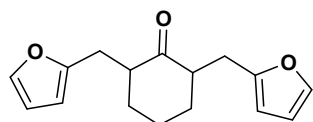

The yield of product was isolated through column chromatography (PE/EA=4:1) on silica gel as colourless oil (25.8mg, 0.10mmol, 40%). <sup>1</sup>H NMR (400 MHz, CDCl<sub>3</sub>) δ 7.22 (d, J = 1.0 Hz, 2H), 6.20 (dd, J = 2.9, 1.9 Hz, 2H), 5.94 (d, J = 3.1 Hz, 2H), 3.10 (dd, J = 15.3, 4.9 Hz, 2H), 2.70 – 2.60 (m, 2H), 2.46 (dd, J = 15.3, 8.4 Hz, 2H), 2.09 – 2.02 (m, 2H), 1.83 – 1.53 (m, 4H). <sup>13</sup>C NMR (101 MHz, CDCl<sub>3</sub>) δ 211.69 (s), 154.20 (s), 141.01 (s), 110.21 (s), 106.26 (s), 50.01 (s), 34.91 (s), 27.79 (s), 25.18 (s).

2-(furan-2-ylmethylene)cycloheptan-1-one **3e<sup>1</sup>**

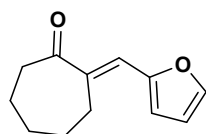

The yield of product was isolated through column chromatography (PE/EA=4:1) on silica gel as colourless oil (30.4mg, 0.16mmol, 32%). <sup>1</sup>H NMR (400 MHz, CDCl<sub>3</sub>) δ 7.44 (d, J = 1.6 Hz, 1H), 7.12 (s, 1H), 6.53 (d, J = 3.4 Hz, 1H), 6.40 (dd, J = 3.4, 1.8 Hz, 1H), 2.87 (d, J = 5.7 Hz, 2H), 2.67 – 2.56 (m, 2H), 1.76 – 1.61 (m, 6H). <sup>13</sup>C NMR (101 MHz, CDCl<sub>3</sub>) δ 204.97 (s), 152.08 (s), 144.01 (s), 137.55 (s), 121.97 (s), 115.76 (s), 111.95 (s), 43.09 (s), 31.34 (s), 29.52 (s), 28.18 (s), 25.30 (s). HRMS (EI) calcd. for C<sub>12</sub>H<sub>14</sub>O<sub>2</sub>[M]: 190.0994; found:190.0987.

2-(furan-2-ylmethyl)cycloheptan-1-one **3e<sup>2</sup>**

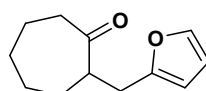

The yield of product was isolated through column chromatography (PE/EA=4:1) on silica gel as colourless oil (49.9mg, 0.26mmol, 52%). <sup>1</sup>H NMR (400 MHz, CDCl<sub>3</sub>) δ 7.22 (d, J = 1.6 Hz, 1H), 6.21 – 6.18 (m, 1H), 5.93 (d, J = 3.1 Hz, 1H), 2.97 (dd, J = 15.0, 5.7 Hz, 1H), 2.60 – 2.53 (m, 1H), 2.45 – 2.35 (m, 2H), 1.82 – 1.69 (m, 5H), 1.36 – 1.16 (m, 4H). <sup>13</sup>C NMR (101 MHz, CDCl<sub>3</sub>) δ 214.91 (s), 154.03 (s), 141.12 (s), 110.17 (s), 106.37 (s), 50.64 (s), 43.26 (s), 30.68 (s), 30.06 (s), 29.25 (s), 28.90 (s), 23.98 (s). HRMS (EI) calcd. for C<sub>12</sub>H<sub>16</sub>O<sub>2</sub>[M]: 192.1150; found:192.1158.

2-ethyl-5-(furan-2-ylmethylene)cyclopentan-1-one **3f**

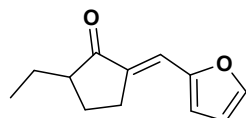

The yield of product was isolated through column chromatography (PE/EA=4:1) on silica gel as colourless oil (43.7mg, 0.23mmol, 46%). <sup>1</sup>H NMR (400 MHz, CDCl<sub>3</sub>) δ 7.48 (s, 1H), 7.10 (t, J = 2.6 Hz,

1H), 6.58 (d,  $J = 3.4$  Hz, 1H), 6.43 (dd,  $J = 3.2, 1.7$  Hz, 1H), 2.99 (dd,  $J = 18.2, 8.4$  Hz, 1H), 2.73 – 2.63 (m, 1H), 2.20 (ddd,  $J = 16.1, 8.7, 3.7$  Hz, 2H), 1.82 (ddd,  $J = 13.4, 7.5, 4.5$  Hz, 1H), 1.52 (td,  $J = 8.7, 2.4$  Hz, 1H), 1.31 (dt,  $J = 21.8, 7.4$  Hz, 1H), 0.91 (t,  $J = 7.5$  Hz, 3H).  $^{13}\text{C}$  NMR (101 MHz,  $\text{CDCl}_3$ )  $\delta$  208.88 (s), 152.39 (s), 144.75 (s), 134.04 (s), 118.75 (s), 115.69 (s), 112.42 (s), 50.13 (s), 27.21 (s), 26.10 (s), 23.30 (s), 11.80 (s). HRMS (EI) calcd. for  $\text{C}_{12}\text{H}_{14}\text{O}_2$ [M]: 190.0994; found:190.0987.

### 6-(furan-2-ylmethylene)-3-methylcyclohex-2-en-1-one **3h**

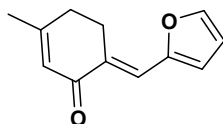

The yield of product was isolated through column chromatography (PE/EA=4:1) on silica gel as colourless oil (19.8mg, 0.11mmol, 21%).  $^1\text{H}$  NMR (400 MHz,  $\text{CDCl}_3$ )  $\delta$  7.25 (d,  $J = 1.5$  Hz, 1H), 6.94 (d,  $J = 7.6$  Hz, 1H), 6.58 (s, 1H), 6.21 (dd,  $J = 2.9, 2.0$  Hz, 1H), 5.96 (d,  $J = 3.1$  Hz, 1H), 5.00 (d,  $J = 6.6$  Hz, 1H), 3.87 (s, 2H), 2.21 (s, 3H), 1.18 (s, 1H).  $^{13}\text{C}$  NMR (101 MHz,  $\text{CDCl}_3$ )  $\delta$  153.82 (s), 153.62 (s), 141.59 (s), 138.35 (s), 130.45 (s), 121.82 (s), 121.22 (s), 116.85 (s), 110.42 (s), 106.10 (s), 29.73 (s), 28.99 (s), 21.04 (s). HRMS (EI) calcd. for  $\text{C}_{12}\text{H}_{12}\text{O}_2$ [M]: 188.0837; found:188.0831.

### 3-(furan-2-yl)-2-methylacrylaldehyde **5a**<sup>[4]</sup>

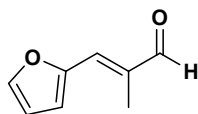

The yield of product was isolated through column chromatography (PE/EA=4:1) on silica gel as colourless oil (32.7mg, 0.24mmol, 48%).  $^1\text{H}$  NMR (400 MHz,  $\text{CDCl}_3$ )  $\delta$  9.48 (d,  $J = 0.8$  Hz, 1H), 7.62 (s, 1H), 7.02 (s, 1H), 6.77 (d,  $J = 3.4$  Hz, 1H), 6.61 – 6.53 (m, 1H), 2.09 (s, 3H).  $^{13}\text{C}$  NMR (101 MHz,  $\text{CDCl}_3$ )  $\delta$  194.18 (s), 151.62 (s), 145.34 (s), 135.42 (s), 134.97 (s), 116.52 (s), 112.66 (s), 10.58 (s).

### 2-(furan-2-ylmethylene)butanal **5b**<sup>[5]</sup>

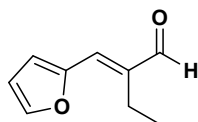

The yield of product was isolated through column chromatography (PE/EA=4:1) on silica gel as colourless oil (66.0mg, 0.44mmol, 88%).  $^1\text{H}$  NMR (400 MHz,  $\text{CDCl}_3$ )  $\delta$  9.39 (s, 1H), 7.54 (s, 1H), 6.86 (s, 1H), 6.75 – 6.64 (m, 1H), 6.53 – 6.39 (m, 1H), 2.58 (d,  $J = 7.5$  Hz, 2H), 1.04 – 0.98 (m, 3H).  $^{13}\text{C}$  NMR (101 MHz,  $\text{CDCl}_3$ )  $\delta$  194.20 (s), 151.26 (s), 145.41 (s), 141.13 (s), 134.84 (s), 116.53 (s), 112.62 (s), 18.14 (s), 12.77 (s).

### 2-(furan-2-ylmethylene)-3-methylbutanal **5c**<sup>[6]</sup>



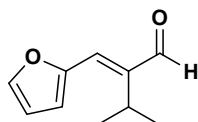

The yield of product was isolated through column chromatography (PE/EA=4:1) on silica gel as colourless oil (20.5mg, 0.13mmol, 25%).  $^1\text{H}$  NMR (400 MHz,  $\text{CDCl}_3$ )  $\delta$  9.37 (d,  $J = 1.7$  Hz, 1H), 7.53 (d,  $J = 1.5$  Hz, 1H), 6.77 (s, 1H), 6.68 (d,  $J = 3.5$  Hz, 1H), 6.48 (dd,  $J = 3.4, 1.7$  Hz, 1H), 3.49 – 3.40 (m, 1H), 1.21 (s, 6H).  $^{13}\text{C}$  NMR (101 MHz,  $\text{CDCl}_3$ )  $\delta$  194.81 (s), 151.11 (s), 145.15 (s), 144.20 (s), 134.88 (s), 116.76 (s), 112.46 (s), 27.04 (s), 19.99 (s).

#### 6-(furan-2-ylmethyl)pentanal **5d**<sup>[4]</sup>

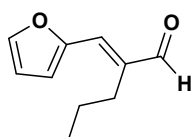

The yield of product was isolated through column chromatography (PE/EA=4:1) on silica gel as colourless oil (46.7mg, 0.29mmol, 57%).  $^1\text{H}$  NMR (400 MHz,  $\text{CDCl}_3$ )  $\delta$  9.40 (s, 1H), 7.54 (d,  $J = 1.6$  Hz, 1H), 6.89 (s, 1H), 6.69 (d,  $J = 3.5$  Hz, 1H), 6.49 (dd,  $J = 3.4, 1.8$  Hz, 1H), 2.63 – 2.42 (m, 2H), 1.42 (dd,  $J = 15.3, 7.6$  Hz, 2H), 0.90 (t,  $J = 7.4$  Hz, 3H).  $^{13}\text{C}$  NMR (101 MHz,  $\text{CDCl}_3$ )  $\delta$  194.43 (s), 151.37 (s), 145.35 (s), 139.76 (s), 135.30 (s), 116.52 (s), 112.61 (s), 26.70 (s), 21.62 (s), 14.22 (s).

#### 2-(furan-2-ylmethylene)hexanal **5e**<sup>[4]</sup>

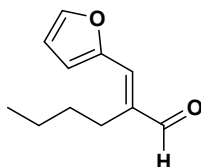

The yield of product was isolated through column chromatography (PE/EA=4:1) on silica gel as colourless oil (42.7mg, 0.24mmol, 48%).  $^1\text{H}$  NMR (400 MHz,  $\text{CDCl}_3$ )  $\delta$  9.39 (s, 1H), 7.54 (d,  $J = 1.2$  Hz, 1H), 6.87 (s, 1H), 6.69 (d,  $J = 3.5$  Hz, 1H), 6.49 (dd,  $J = 3.4, 1.7$  Hz, 1H), 2.56 (t,  $J = 7.4$  Hz, 2H), 1.37 – 1.26 (m, 4H), 0.85 (d,  $J = 7.0$  Hz, 3H).  $^{13}\text{C}$  NMR (101 MHz,  $\text{CDCl}_3$ )  $\delta$  194.40 (s), 151.37 (s), 145.33 (s), 140.00 (s), 135.13 (s), 116.47 (s), 112.62 (s), 30.48 (s), 24.59 (s), 22.97 (s), 13.94 (s).

#### 4-(furan-2-yl)butan-2-one **7a**<sup>[7]</sup>

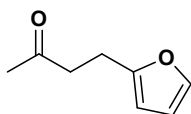

The yield of product was isolated through column chromatography (PE/EA=4:1) on silica gel as colourless oil (39.3mg, 0.29mmol, 57%).  $^1\text{H}$  NMR (400 MHz,  $\text{CDCl}_3$ )  $\delta$  7.24 – 7.13 (m, 1H), 6.22 – 6.14

(m, 1H), 5.93 – 5.82 (m, 1H), 2.85 (d, J = 7.4 Hz, 1H), 2.69 (d, J = 7.2 Hz, 1H), 1.19 (s, 3H), 0.83 – 0.76 (m, 2H). <sup>13</sup>C NMR (101 MHz, CDCl<sub>3</sub>) δ 207.92 (s), 154.47 (s), 141.11 (s), 110.22 (s), 105.25 (s), 40.85 (s), 29.71 (s), 22.14 (s).

1-(furan-2-yl)-4,4-dimethylpentan-3-one **7c**<sup>[8]</sup>

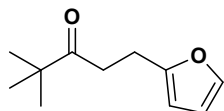

The yield of product was isolated through column chromatography (PE/EA=4:1) on silica gel as colourless oil (57.6mg, 0.32mmol, 64%). <sup>1</sup>H NMR (400 MHz, CDCl<sub>3</sub>) δ 7.21 (d, J = 1.0 Hz, 1H), 6.19 (s, 1H), 5.92 (d, J = 0.5 Hz, 1H), 2.78 (ddd, J = 9.9, 6.5, 2.6 Hz, 4H), 1.10 (d, J = 33.8 Hz, 12H). <sup>13</sup>C NMR (101 MHz, CDCl<sub>3</sub>) δ 214.45 (s), 155.01 (s), 140.98 (s), 110.20 (s), 105.16 (s), 44.16 (s), 34.99 (s), 26.33 (s), 22.48 (s).

1-(furan-2-yl)-5-methylhexan-3-one **7d**<sup>[9]</sup>

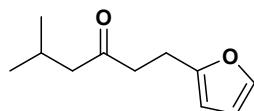

The yield of product was isolated through column chromatography (PE/EA=4:1) on silica gel as colourless oil (72.0mg, 0.40mmol, 80%). <sup>1</sup>H NMR (400 MHz, CDCl<sub>3</sub>) δ 7.20 (t, J = 2.0 Hz, 1H), 6.18 (dd, J = 3.0, 1.9 Hz, 1H), 5.95 – 5.85 (m, 1H), 2.83 (t, J = 7.4 Hz, 2H), 2.65 (t, J = 7.4 Hz, 2H), 2.21 (d, J = 7.0 Hz, 2H), 2.07 (dt, J = 13.7, 6.8 Hz, 1H), 0.83 (d, J = 6.6 Hz, 6H). <sup>13</sup>C NMR (101 MHz, CDCl<sub>3</sub>) δ 209.30 (s), 154.68 (s), 141.01 (s), 110.20 (s), 105.17 (s), 51.87 (s), 41.26 (s), 24.62 (s), 22.55 (s), 22.10 (s).

1-(furan-2-yl)-4-methylhexan-3-one **7e**

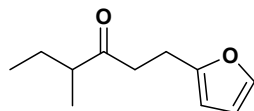

The yield of product was isolated through column chromatography (PE/EA=4:1) on silica gel as colourless oil (77.4mg, 0.43mmol, 86%). <sup>1</sup>H NMR (400 MHz, CDCl<sub>3</sub>) δ 7.24 – 7.20 (m, 1H), 6.19 (dd, J = 3.0, 1.9 Hz, 1H), 5.93 – 5.89 (m, 1H), 2.84 (t, J = 7.4 Hz, 2H), 2.74 – 2.67 (m, 2H), 2.38 (dd, J = 13.7, 6.9 Hz, 1H), 1.59 (dd, J = 13.9, 6.9 Hz, 1H), 1.35 – 1.28 (m, 1H), 0.99 (d, J = 7.0 Hz, 3H), 0.78 (t, J = 7.4 Hz, 3H). <sup>13</sup>C NMR (101 MHz, CDCl<sub>3</sub>) δ 213.20 (s), 154.82 (s), 141.00 (s), 110.21 (s), 105.18 (s), 48.00 (s), 39.21 (s), 25.90 (s), 22.14 (s), 15.80 (s), 11.64 (s). HRMS (EI) calcd. for C<sub>11</sub>H<sub>16</sub>O<sub>2</sub>[M]: 180.1150; found:180.1514

1-(furan-2-yl)-6-methylheptan-3-one **7f**

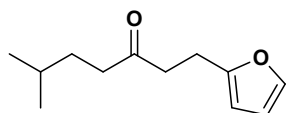

The yield of product was isolated through column chromatography (PE/EA=4:1) on silica gel as colourless oil (56.3mg, 0.29mmol, 58%). <sup>1</sup>H NMR (400 MHz, CDCl<sub>3</sub>) δ 7.23 – 7.18 (m, 1H), 6.19 (dd, J = 3.0, 1.9 Hz, 1H), 5.92 (dd, J = 5.3, 4.9 Hz, 1H), 2.83 (q, J = 7.2 Hz, 2H), 2.73 – 2.63 (m, 2H), 2.39 – 2.27 (m, 2H), 1.49 – 1.35 (m, 3H), 0.80 (t, J = 6.3 Hz, 6H). <sup>13</sup>C NMR (101 MHz, CDCl<sub>3</sub>) δ 209.89 (s), 154.69 (s), 141.05 (s), 110.21 (s), 105.17 (s), 40.95 (s), 40.71 (s), 32.59 (s), 27.69 (s), 22.28 (d, J = 11.3 Hz). HRMS (EI) calcd. for C<sub>12</sub>H<sub>18</sub>O<sub>2</sub>[M]: 194.1307; found:194.1315.

#### 1-cyclopentyl-3-(furan-2-yl)propan-1-one **7g**

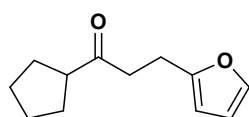

The yield of product was isolated through column chromatography (PE/EA=4:1) on silica gel as colourless oil (75.8mg, 0.39mmol, 79%). <sup>1</sup>H NMR (400 MHz, CDCl<sub>3</sub>) δ 7.21 (d, J = 1.2 Hz, 1H), 6.19 (dd, J = 3.0, 1.9 Hz, 1H), 5.91 (d, J = 2.9 Hz, 1H), 2.86 – 2.70 (m, 5H), 1.73 – 1.49 (m, 8H). <sup>13</sup>C NMR (101 MHz, CDCl<sub>3</sub>) δ 211.72 (s), 154.88 (s), 141.00 (s), 110.21 (s), 105.13 (s), 51.51 (s), 39.82 (s), 28.83 (s), 25.99 (s), 22.29 (s). HRMS (EI) calcd. for C<sub>12</sub>H<sub>16</sub>O<sub>2</sub>[M]: 192.1150; found:192.1514.

#### 1-(furan-2-yl)-1-(thiophen-2-yl)propan-1-one **7h**

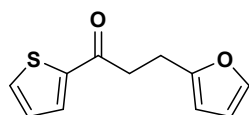

The yield of product was isolated through column chromatography (PE/EA=4:1) on silica gel as colourless oil (65.9mg, 0.32mmol, 64%). <sup>1</sup>H NMR (400 MHz, CDCl<sub>3</sub>) δ 7.64 (dd, J = 3.8, 1.0 Hz, 1H), 7.56 (dd, J = 4.9, 1.0 Hz, 1H), 7.23 (d, J = 1.2 Hz, 1H), 7.05 (dd, J = 4.9, 3.8 Hz, 1H), 6.20 (dd, J = 3.0, 1.9 Hz, 1H), 5.97 (dd, J = 3.1, 0.6 Hz, 1H), 3.19 (dd, J = 8.5, 6.7 Hz, 2H), 3.04 – 2.98 (m, 2H). <sup>13</sup>C NMR (101 MHz, CDCl<sub>3</sub>) δ 191.62 (s), 154.44 (s), 144.02 (s), 141.19 (s), 133.67 (s), 131.91 (s), 128.13 (s), 110.28 (s), 105.48 (s), 37.61 (s), 22.73 (s). HRMS (EI) calcd. for C<sub>11</sub>H<sub>10</sub>O<sub>2</sub>S[M]: 206.0402; found:206.0409.

#### 1,3-di(furan-2-yl)propan-1-one **7i<sup>10</sup>**

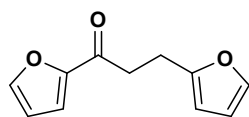

The yield of product was isolated through column chromatography (PE/EA=4:1) on silica gel as colourless oil (58.9mg, 0.31mmol, 62%). <sup>1</sup>H NMR (400 MHz, CDCl<sub>3</sub>) δ 7.51 (d, J = 1.0 Hz, 1H), 7.23

(d,  $J = 1.1$  Hz, 1H), 7.12 (d,  $J = 3.6$  Hz, 1H), 6.46 (dd,  $J = 3.6, 1.7$  Hz, 1H), 6.20 (dd,  $J = 3.0, 1.9$  Hz, 1H), 5.99 – 5.95 (m, 1H), 3.14 – 3.09 (m, 2H), 3.02 – 2.97 (m, 2H).  $^{13}\text{C}$  NMR (101 MHz,  $\text{CDCl}_3$ )  $\delta$  187.88 (s), 154.45 (s), 152.57 (s), 146.40 (s), 141.16 (s), 117.09 (s), 112.24 (s), 110.24 (s), 105.40 (s), 36.71 (s), 22.32 (s).

1-(furan-2-yl)-1-(pyridin-2-yl)propan-1-one **7j**

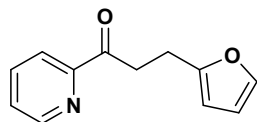

The yield of product was isolated through column chromatography (PE/EA=4:1) on silica gel as colourless oil (90.5mg, 0.45mmol, 90%).  $^1\text{H}$  NMR (400 MHz,  $\text{CDCl}_3$ )  $\delta$  8.61 (d,  $J = 4.5$  Hz, 1H), 7.98 (d,  $J = 7.8$  Hz, 1H), 7.76 (t,  $J = 7.7$  Hz, 1H), 7.40 (dd,  $J = 7.4, 4.9$  Hz, 1H), 7.22 (s, 1H), 6.20 (s, 1H), 5.98 (d,  $J = 2.9$  Hz, 1H), 3.52 (t,  $J = 7.5$  Hz, 2H), 3.02 (t,  $J = 7.5$  Hz, 2H).  $^{13}\text{C}$  NMR (101 MHz,  $\text{CDCl}_3$ )  $\delta$  200.46 (s), 155.02 (s), 153.16 (s), 149.01 (s), 141.01 (s), 136.93 (s), 127.23 (s), 121.82 (s), 110.18 (s), 105.14 (s), 36.18 (s), 22.33 (s). HRMS (EI) calcd. for  $\text{C}_{12}\text{H}_{11}\text{NO}_2$ [M]: 201.0790; found:201.0784.

1-(furan-2-yl)-1-(pyrazin-2-yl)propan-1-one **7k**

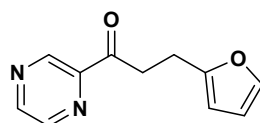

The yield of product was isolated through column chromatography (PE/EA=4:1) on silica gel as colourless oil (69.7mg, 0.34mmol, 69%).  $^1\text{H}$  NMR (400 MHz,  $\text{CDCl}_3$ )  $\delta$  9.17 (d,  $J = 1.4$  Hz, 1H), 8.69 (d,  $J = 2.5$  Hz, 1H), 8.57 (dd,  $J = 2.4, 1.5$  Hz, 1H), 7.22 (dd,  $J = 1.7, 0.6$  Hz, 1H), 6.20 (dd,  $J = 3.1, 1.9$  Hz, 1H), 6.01 – 5.96 (m, 1H), 3.49 (t,  $J = 7.4$  Hz, 2H), 3.03 (t,  $J = 7.4$  Hz, 2H).  $^{13}\text{C}$  NMR (101 MHz,  $\text{CDCl}_3$ )  $\delta$  199.86 (s), 154.49 (s), 147.89 (s), 147.37 (s), 143.62 (d,  $J = 7.4$  Hz), 141.15 (s), 110.22 (s), 105.35 (s), 36.32 (s), 22.08 (s). HRMS (EI) calcd. for  $\text{C}_{11}\text{H}_{10}\text{N}_2\text{O}_2$ [M]: 202.0742; found:202.0751.

2,4-dimethyl-1-(5-methylfuran-2-yl)pent-1-en-3-one **8a**

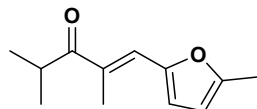

The yield of product was isolated through column chromatography (PE/EA=4:1) on silica gel as colourless oil (52.8mg, 0.27mmol, 55%).  $^1\text{H}$  NMR (400 MHz,  $\text{CDCl}_3$ )  $\delta$  7.19 (d,  $J = 1.3$  Hz, 1H), 6.52 (d,  $J = 3.3$  Hz, 1H), 6.07 (d,  $J = 3.2$  Hz, 1H), 3.43 – 3.29 (m, 1H), 2.30 (s, 3H), 2.05 (s, 3H), 1.07 (d,  $J = 6.8$  Hz, 6H).  $^{13}\text{C}$  NMR (101 MHz,  $\text{CDCl}_3$ )  $\delta$  205.71 (s), 154.76 (s), 150.53 (s), 131.19 (s), 125.50 (s),

116.63 (s), 108.91 (s), 33.64 (s), 19.82 (s), 13.90 (s), 13.32 (s). HRMS (EI) calcd. for C<sub>12</sub>H<sub>16</sub>O<sub>2</sub>[M]: 192.1150; found:192.1153.

3-(5-methylfuran-2-yl)-1-(pyridin-2-yl)propan-1-one **8c**

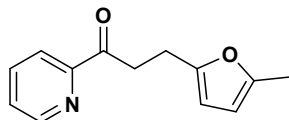

The yield of product was isolated through column chromatography (PE/EA=4:1) on silica gel as colourless oil (79.6mg, 0.37mmol, 74%). <sup>1</sup>H NMR (400 MHz, CDCl<sub>3</sub>) δ 8.59 (d, J = 4.6 Hz, 1H), 7.95 (d, J = 7.8 Hz, 1H), 7.80 – 7.68 (m, 1H), 7.47 – 7.28 (m, 1H), 5.83 (d, J = 2.6 Hz, 1H), 5.74 (s, 1H), 3.48 (t, J = 7.6 Hz, 2H), 2.94 (t, J = 7.5 Hz, 2H), 2.14 (s, 3H). <sup>13</sup>C NMR (101 MHz, CDCl<sub>3</sub>) δ 200.56 (s), 153.19 (d, J = 12.5 Hz), 150.42 (s), 148.96 (s), 136.87 (s), 127.15 (s), 121.77 (s), 105.80 (d, J = 17.2 Hz), 36.33 (s), 22.42 (s), 13.49 (s). HRMS (EI) calcd. for C<sub>13</sub>H<sub>13</sub>NO<sub>2</sub>[M]: 215.0946; found:215.0951.

## Reference

- [1] S. Fu, Z. Shao, Y. Wang, Q. Liu, *J. Am. Chem. Soc.* **2017**, *139*, 11941-11948.
- [2] J. Galambos, G. Wágner, K. Nógrádi, A. Bielik, L. Molnár, A. Bobok, A. Horváth, B. Kiss, S. Kolok, J. Nagy, D. Kurkó, M. L. Bakk, M. Vastag, K. Sághy, I. Gyertyán, K. Gál, I. Greiner, Z. Szombathelyi, G. M. Keserű, G. Domány, *Bioorganic & Medicinal Chemistry Letters* **2010**, *20*, 4371-4375.
- [3] S. B. Kavukcu, S. Günnaz, O. Şahin, H. Türkmen, *Applied Organometallic Chemistry* **2019**, *33*, e4888.
- [4] Z. Zhang, X. Tong, H. Zhang, Y. Li, *Green Chemistry* **2018**, *20*, 3092-3100.
- [5] Y. Zhong, B. Zhou, L. Wang, *Molecular Catalysis* **2020**, *493*, 111056.
- [6] Q. Wang, X. Liu, X. Liu, B. Li, H. Nie, S. Zhang, W. Chen, *Chemical Communications* **2014**, *50*, 978-980.
- [7] H. Kreissl, J. Jin, S.-H. Lin, D. Schüette, S. Störtte, N. Levin, B. Chaudret, A. J. Vorholt, A. Bordet, W. Leitner, *Angewandte Chemie International Edition* **2021**, *60*, 26639-26646.
- [8] M. Schmid, K. R. Sokol, L. A. Wein, S. Torres Venegas, C. Meisenbichler, K. Wurst, M. Podewitz, T. Magauer, *Organic Letters* **2020**, *22*, 6526-6531.
- [9] S. Jiang, C. Ma, E. Muller, M. Pera-Titus, F. Jérôme, K. De Oliveira Vigier, *ACS Catalysis* **2019**, *9*, 8893-8902.
- [10] N. Saburo, S. Takatsugu, N. Takehiko, O. Yoshio, *Chemistry Letters* **1979**, *8*, 955-956.
- [11] Stephens T C, Pattison G. *Organic letters*, 2017, 19(13): 3498-3501.

# Characterization Data of Products

szh-lxy-009

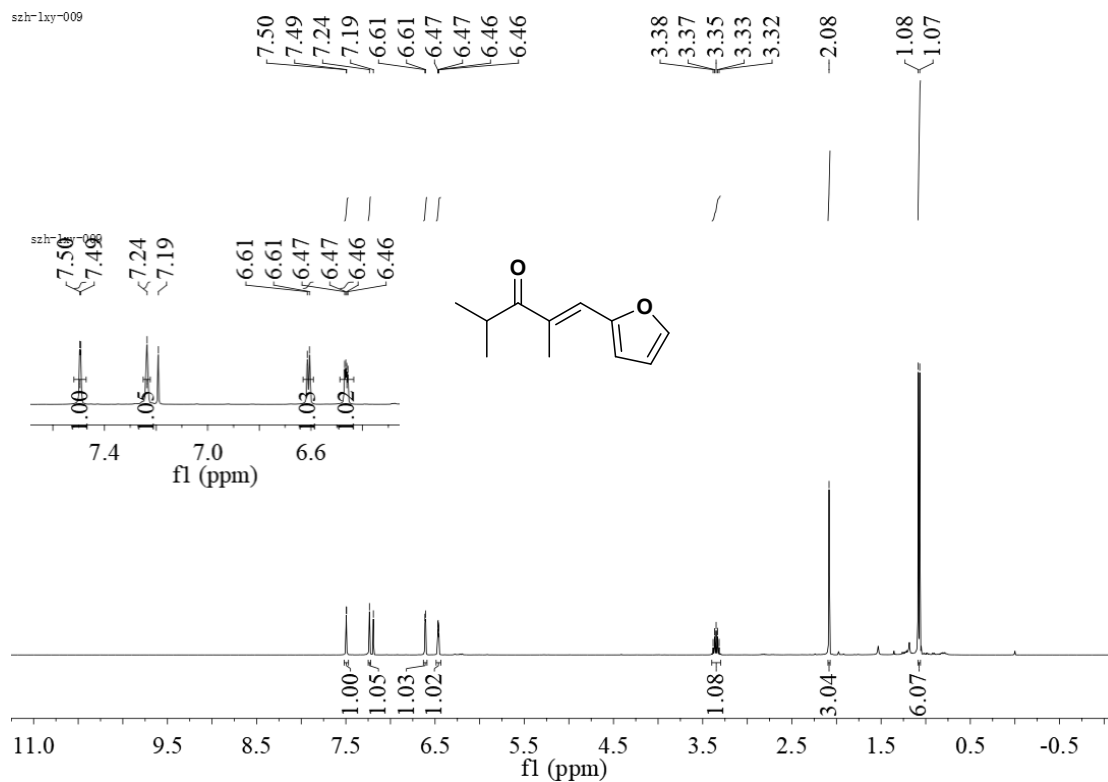

<sup>1</sup>H NMR-spectrum (400 MHz, CDCl<sub>3</sub>) of **3a**

szh-lxy-009

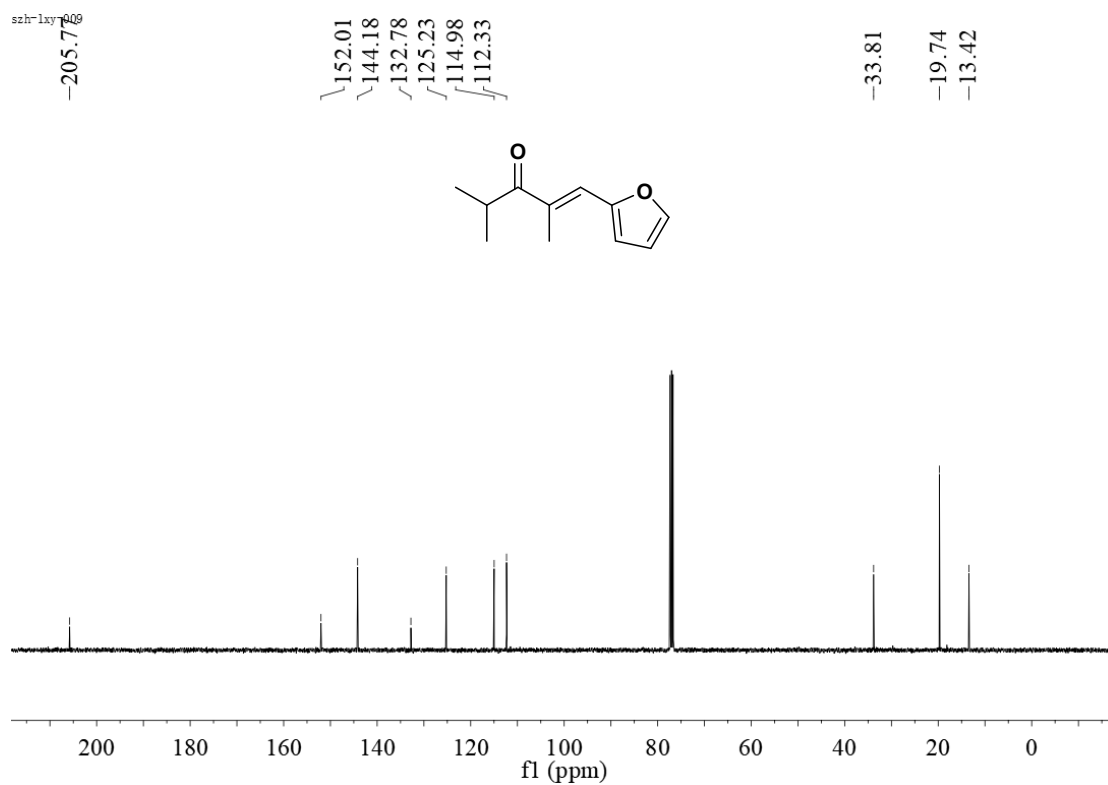

<sup>13</sup>C NMR-spectrum (101 MHz, CDCl<sub>3</sub>) of **3a**

szh-1xy-066

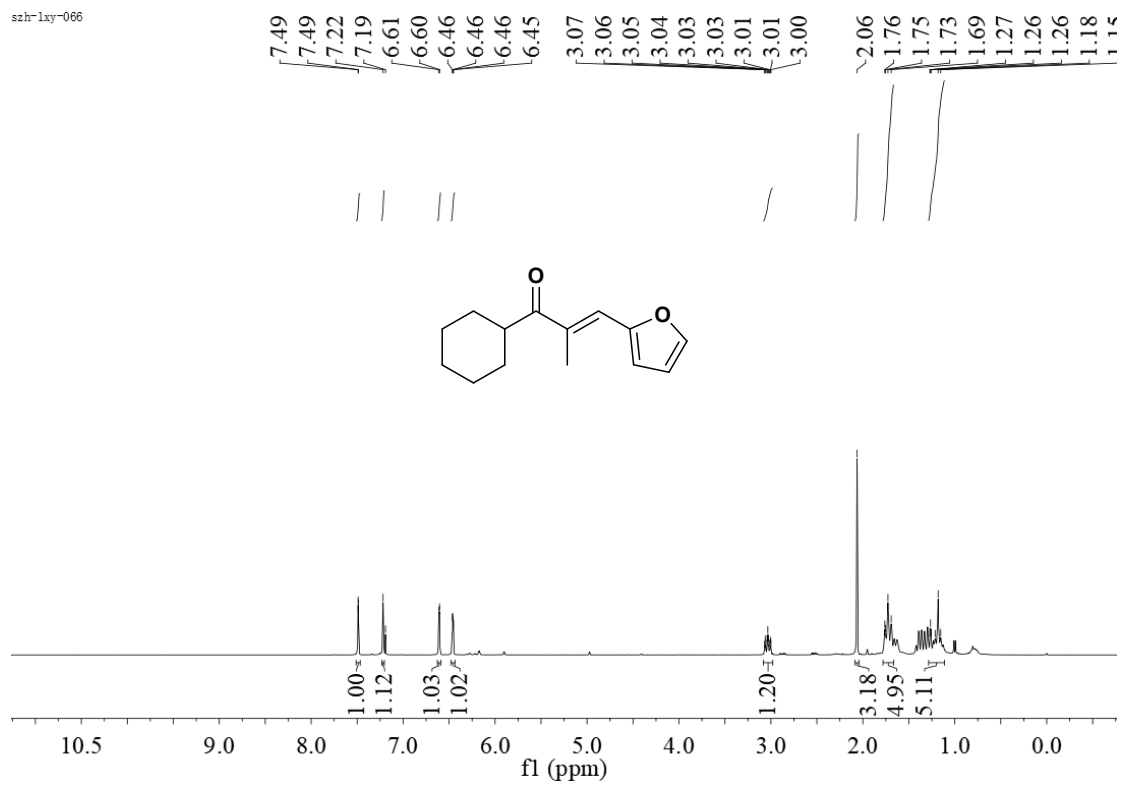

<sup>1</sup>H NMR-spectrum (400 MHz, CDCl<sub>3</sub>) of 3c

szh-1xy-066

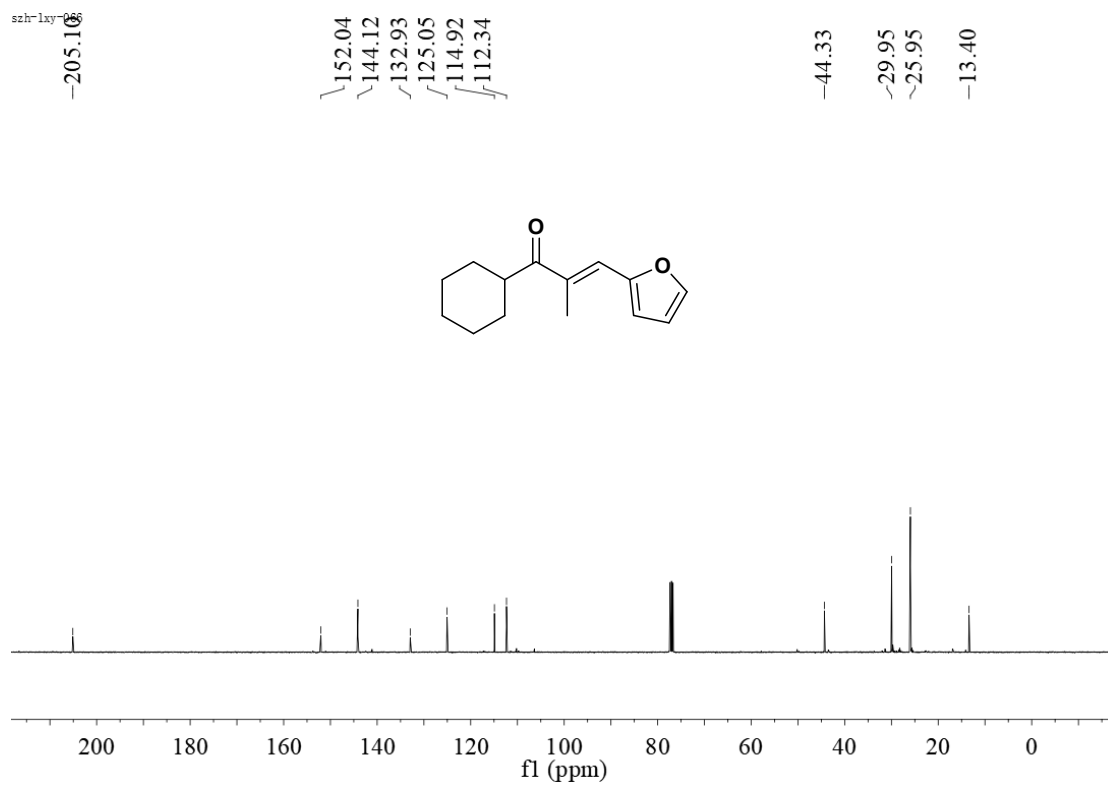

<sup>13</sup>C NMR-spectrum (101 MHz, CDCl<sub>3</sub>) of 3c



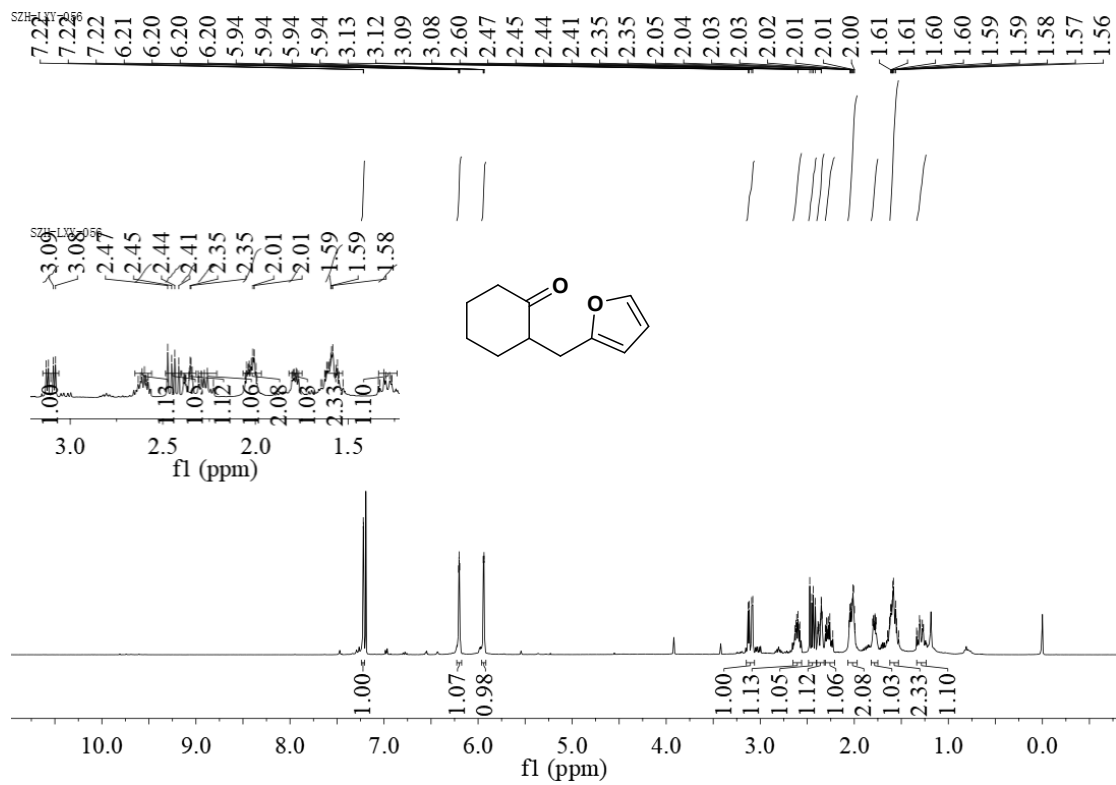

<sup>1</sup>H NMR-spectrum (400 MHz, CDCl<sub>3</sub>) of **3d<sup>1</sup>**

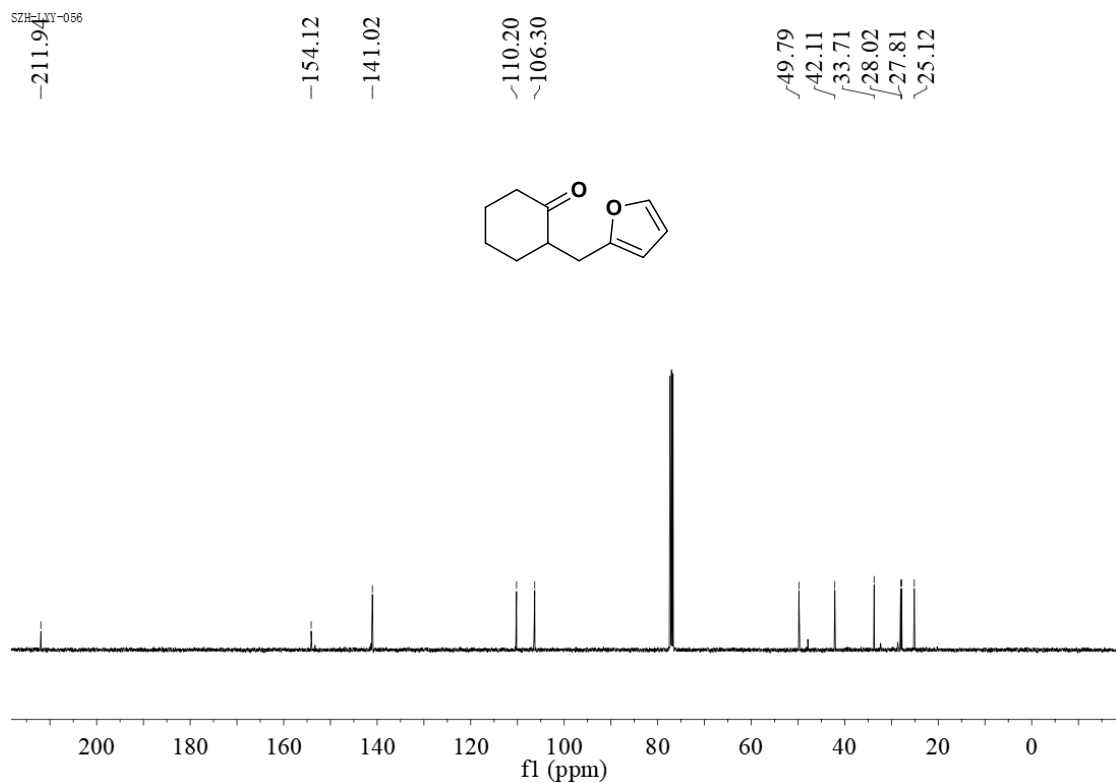

<sup>13</sup>C NMR-spectrum (101 MHz, CDCl<sub>3</sub>) of **3d<sup>1</sup>**

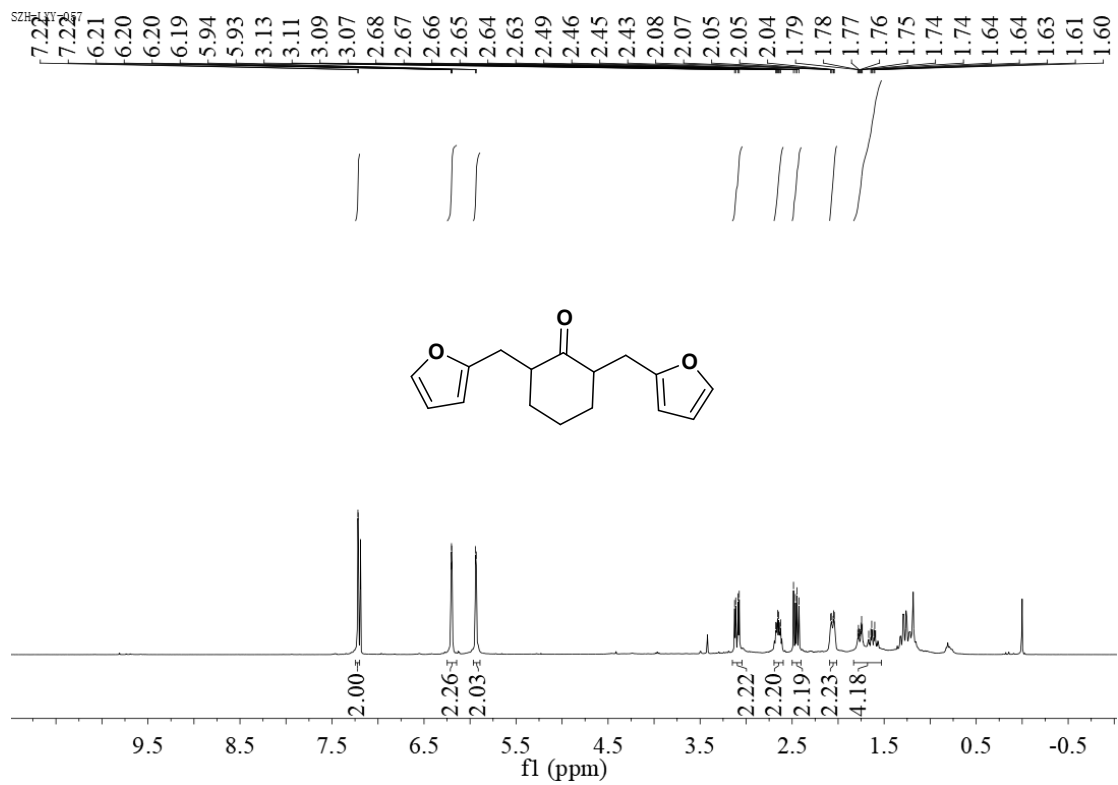

$^1\text{H}$  NMR-spectrum (400 MHz,  $\text{CDCl}_3$ ) of  $3d^2$

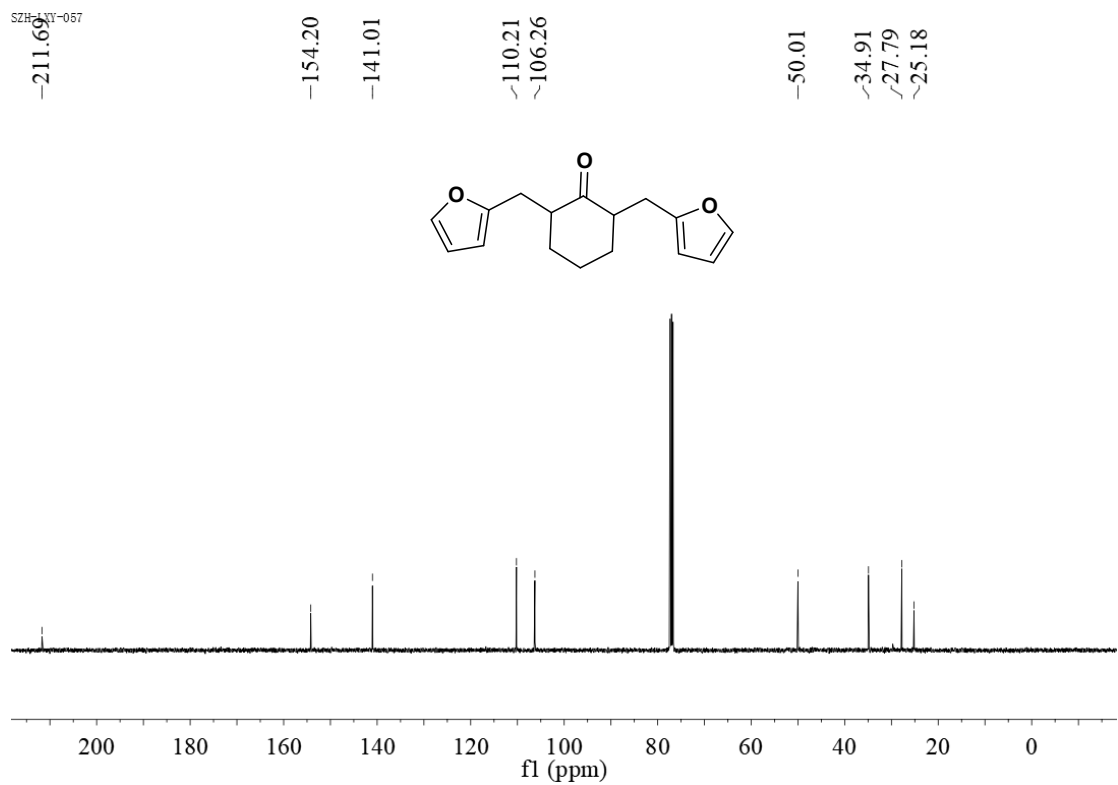

$^{13}\text{C}$  NMR-spectrum (101 MHz,  $\text{CDCl}_3$ ) of  $3d^2$

szh-lxy-072

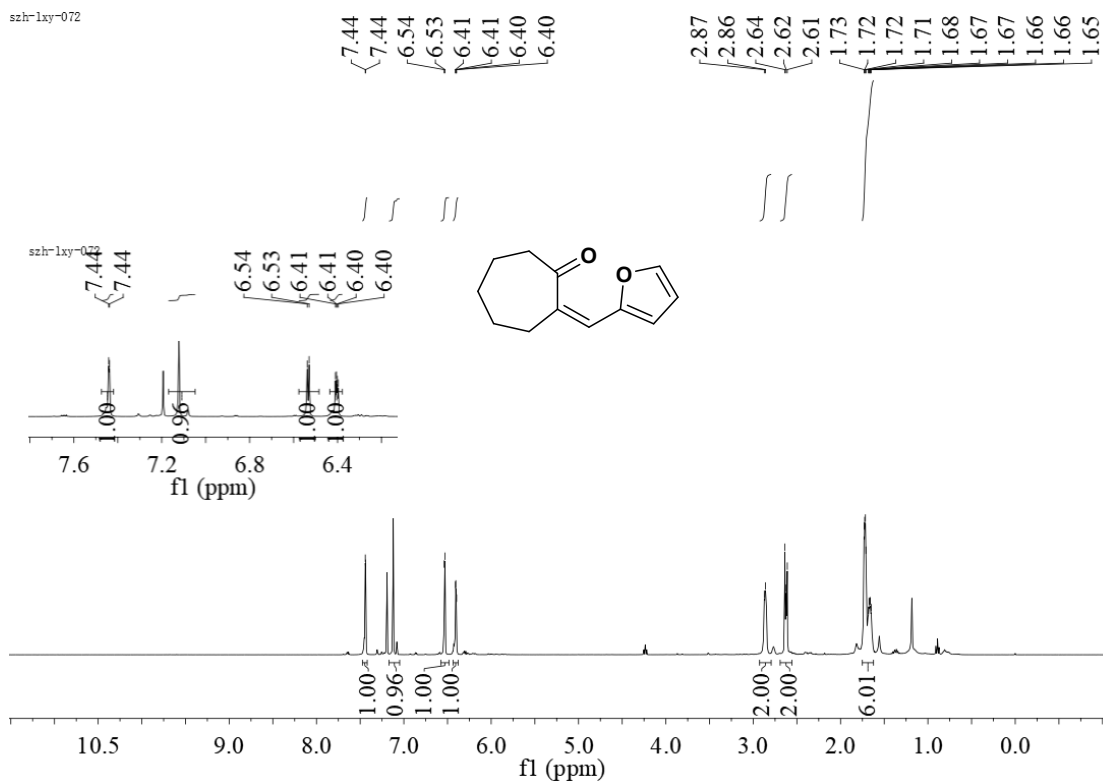

<sup>1</sup>H NMR-spectrum (400 MHz, CDCl<sub>3</sub>) of **3e1**

szh-lxy-072

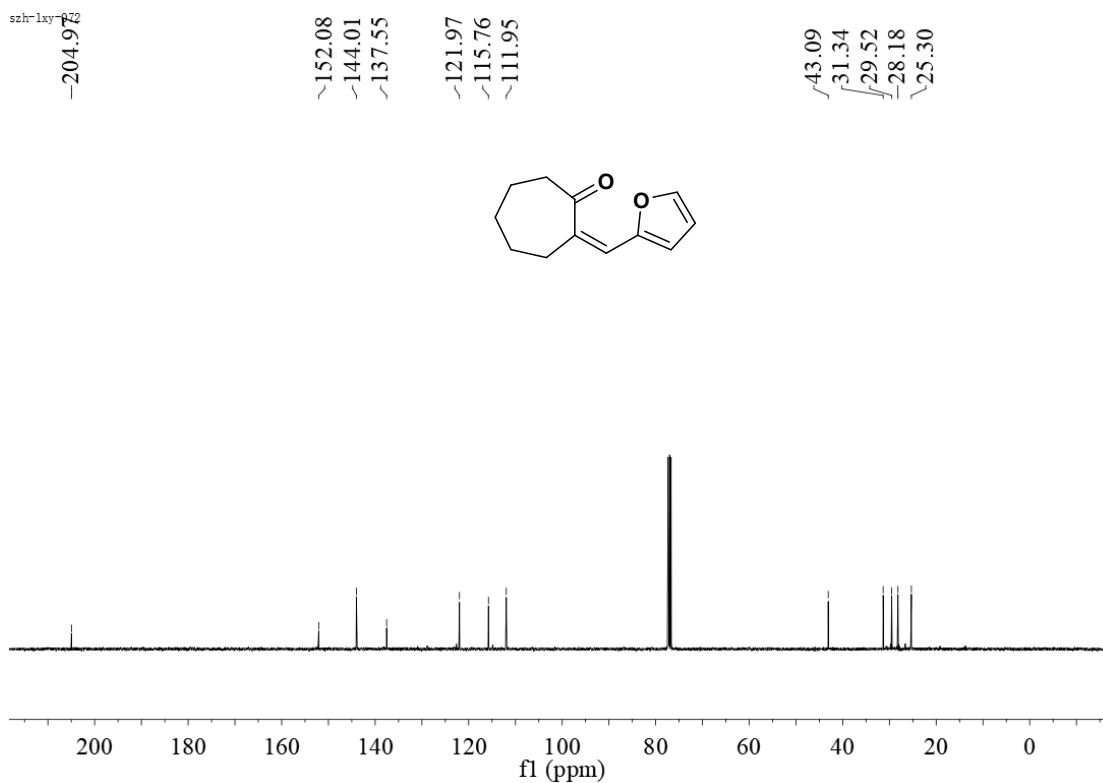

<sup>13</sup>C NMR-spectrum (101 MHz, CDCl<sub>3</sub>) of **3e1**

szh-1xy-062

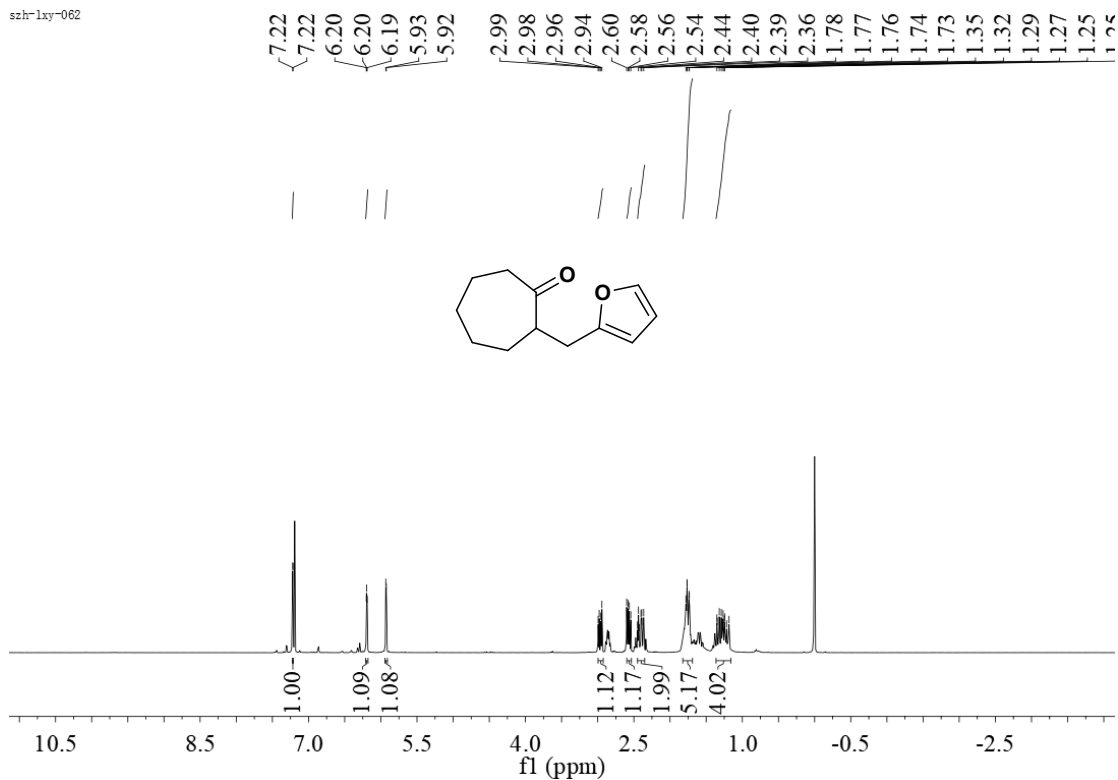

<sup>1</sup>H NMR-spectrum (400 MHz, CDCl<sub>3</sub>) of **3e<sup>2</sup>**

szh-1xy-062

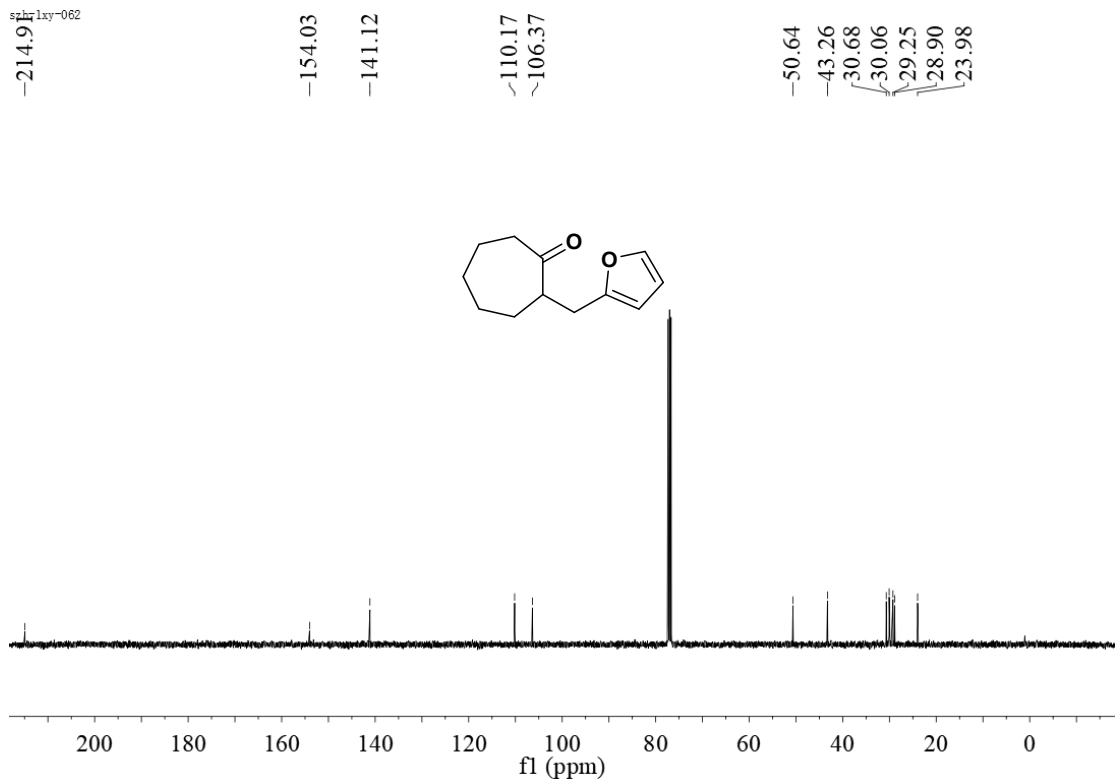

<sup>13</sup>C NMR-spectrum (101 MHz, CDCl<sub>3</sub>) of **3e<sup>2</sup>**

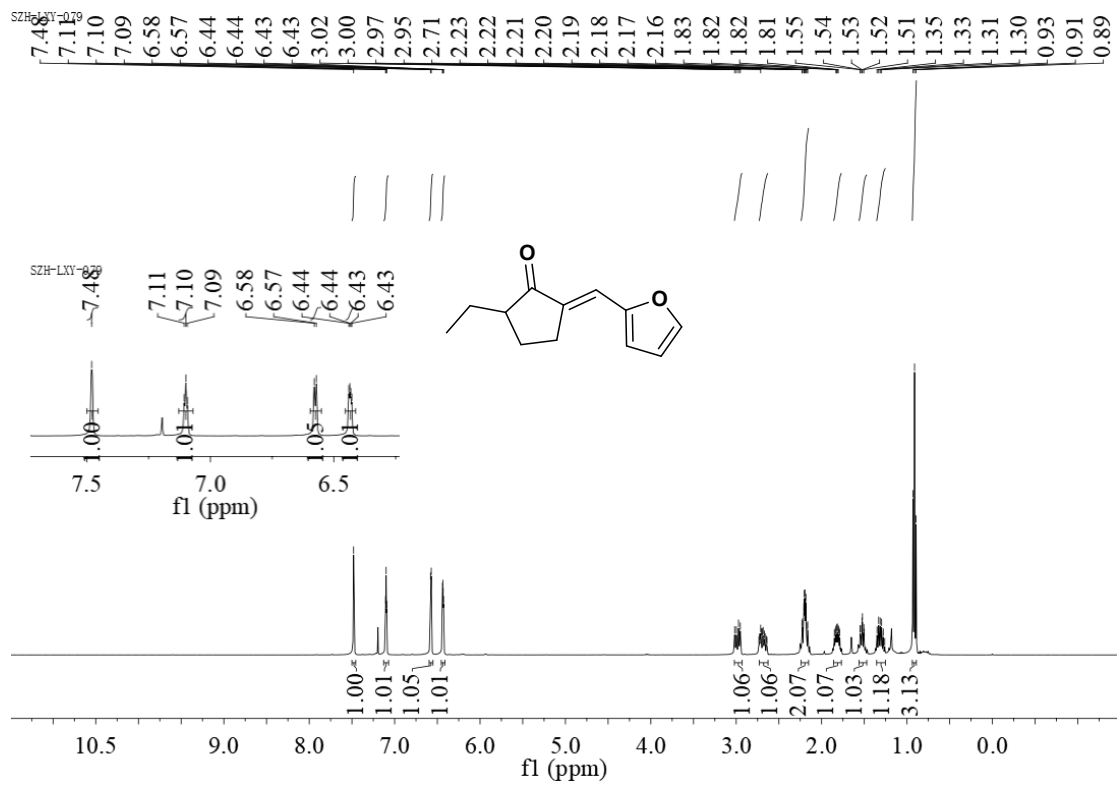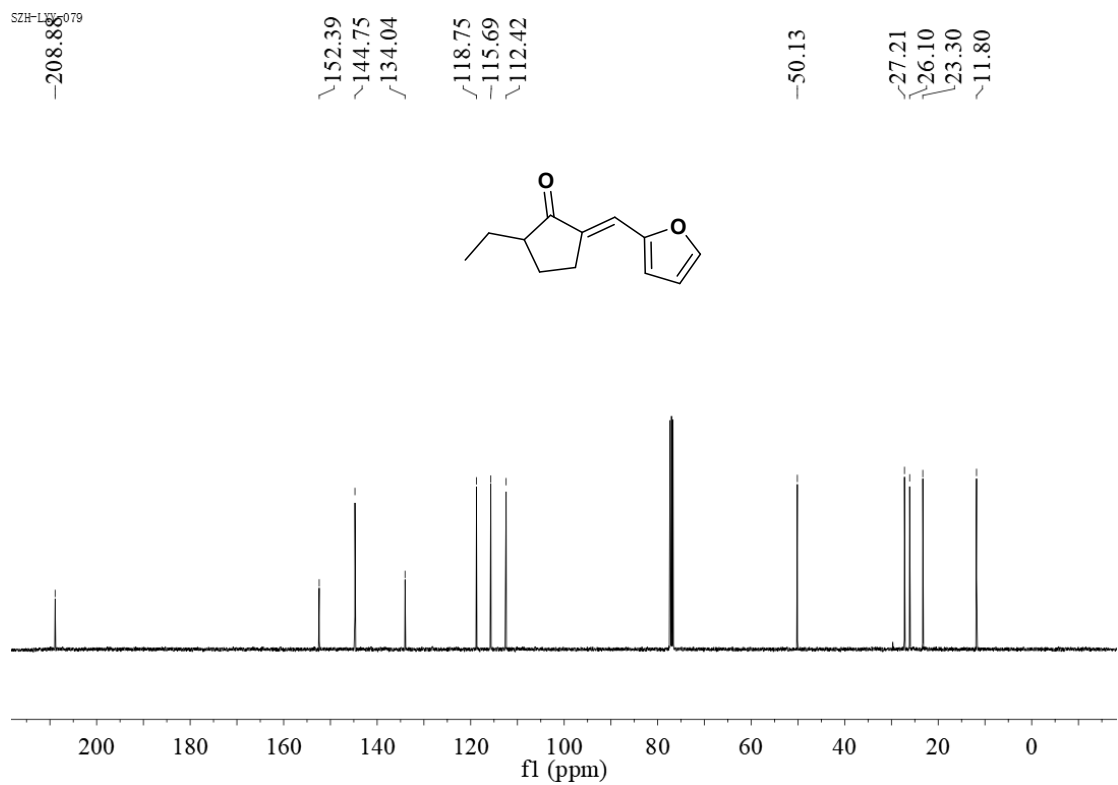

SZH-LXY-077

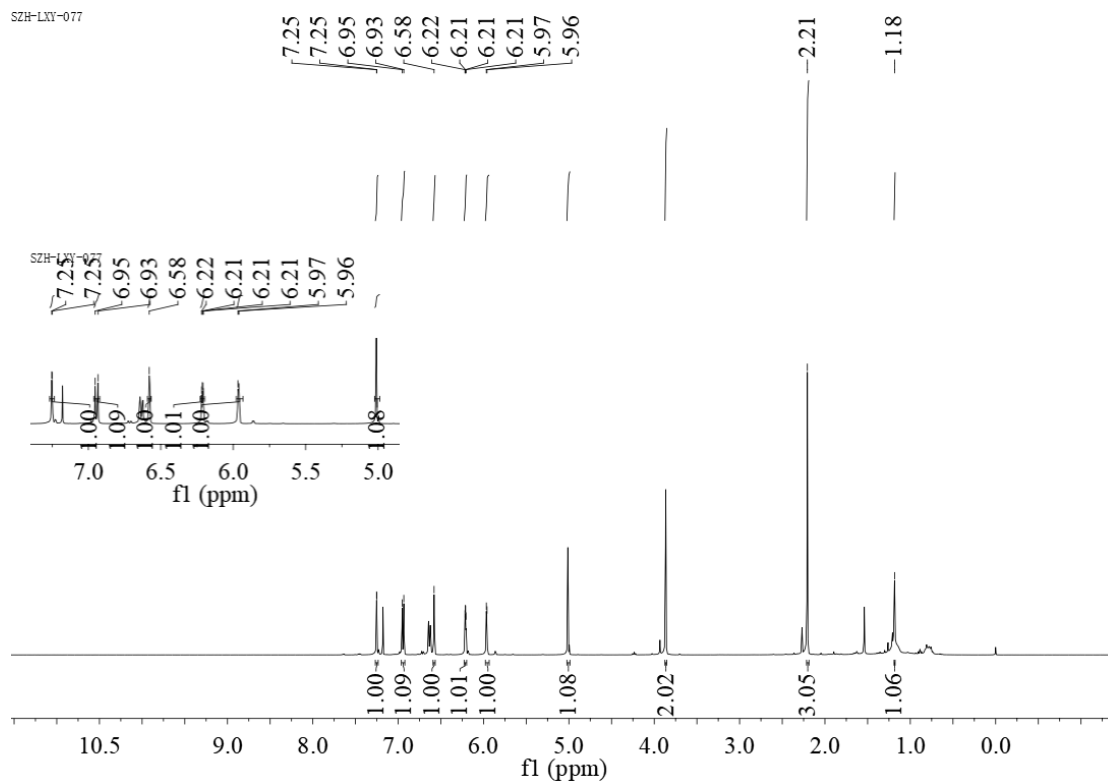

$^1\text{H}$  NMR-spectrum (400 MHz,  $\text{CDCl}_3$ ) of **3h**

SZH-LXY-077

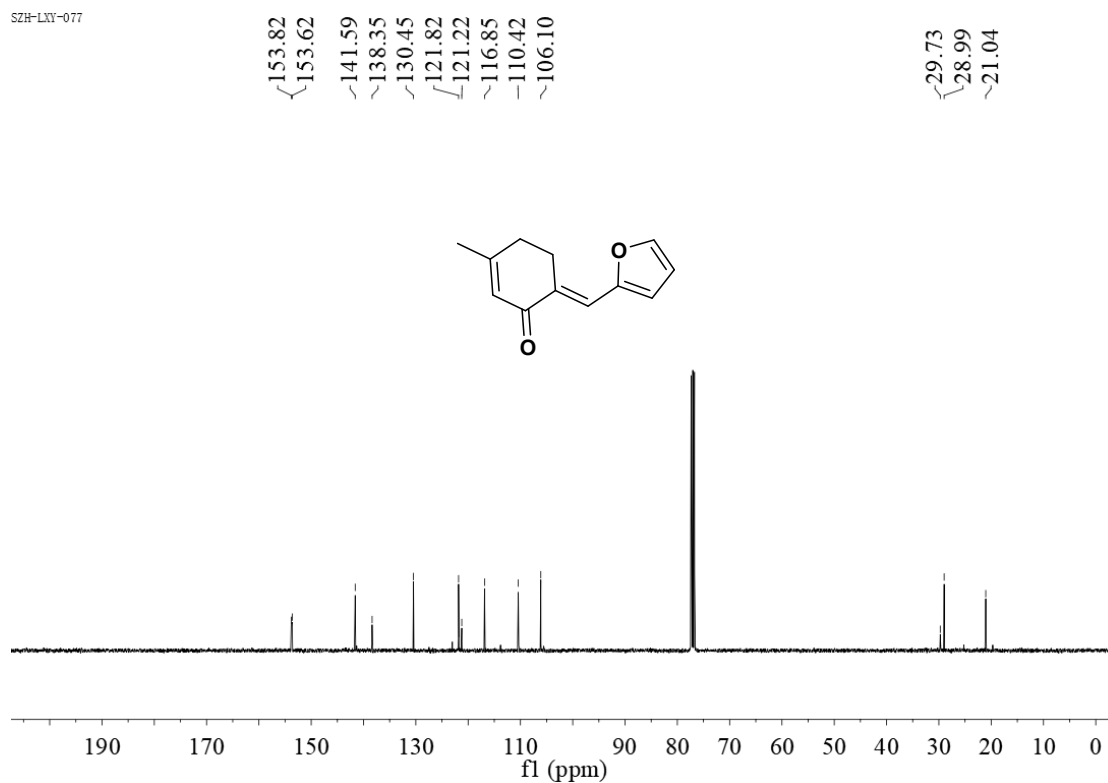

$^{13}\text{C}$  NMR-spectrum (101 MHz,  $\text{CDCl}_3$ ) of **3h**

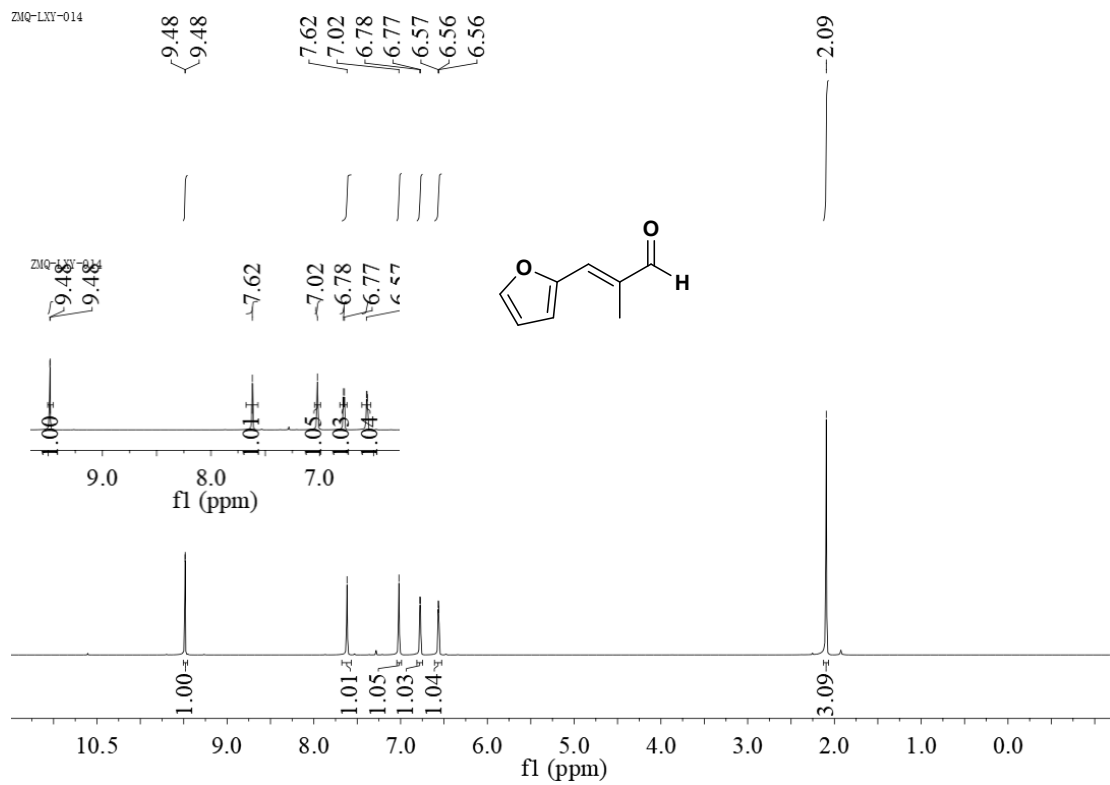

<sup>1</sup>H NMR-spectrum (400 MHz, CDCl<sub>3</sub>) of **5a**

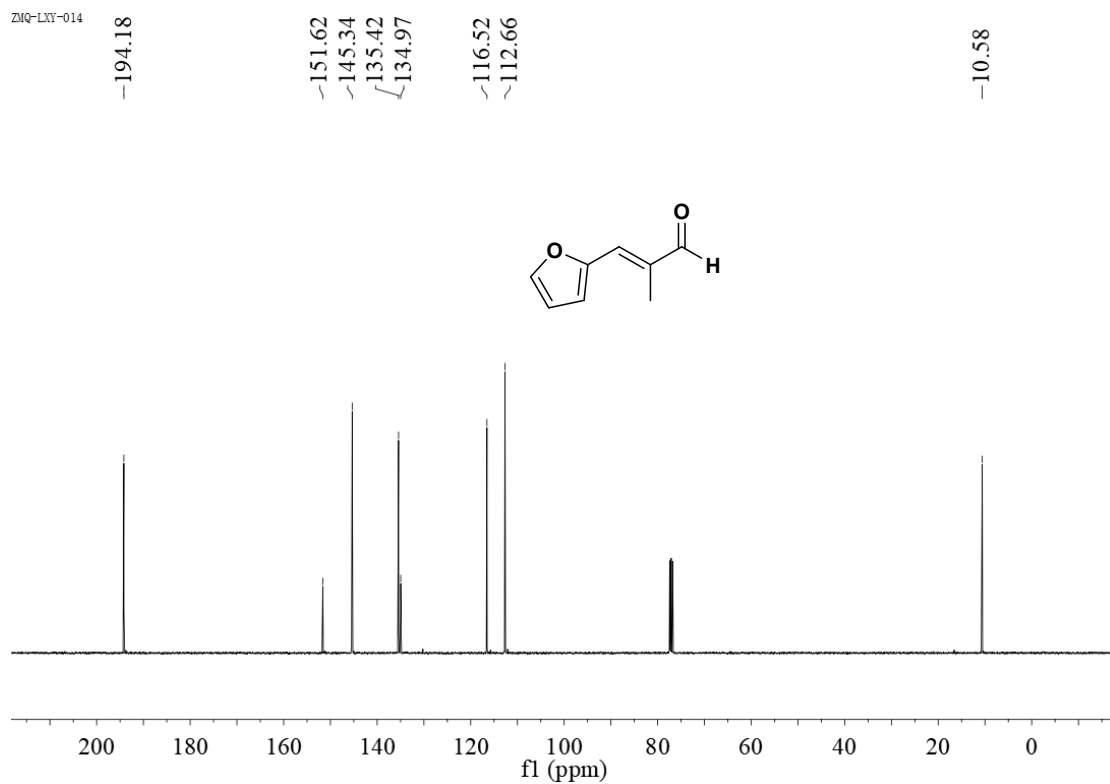

<sup>13</sup>C NMR-spectrum (101 MHz, CDCl<sub>3</sub>) of **5a**

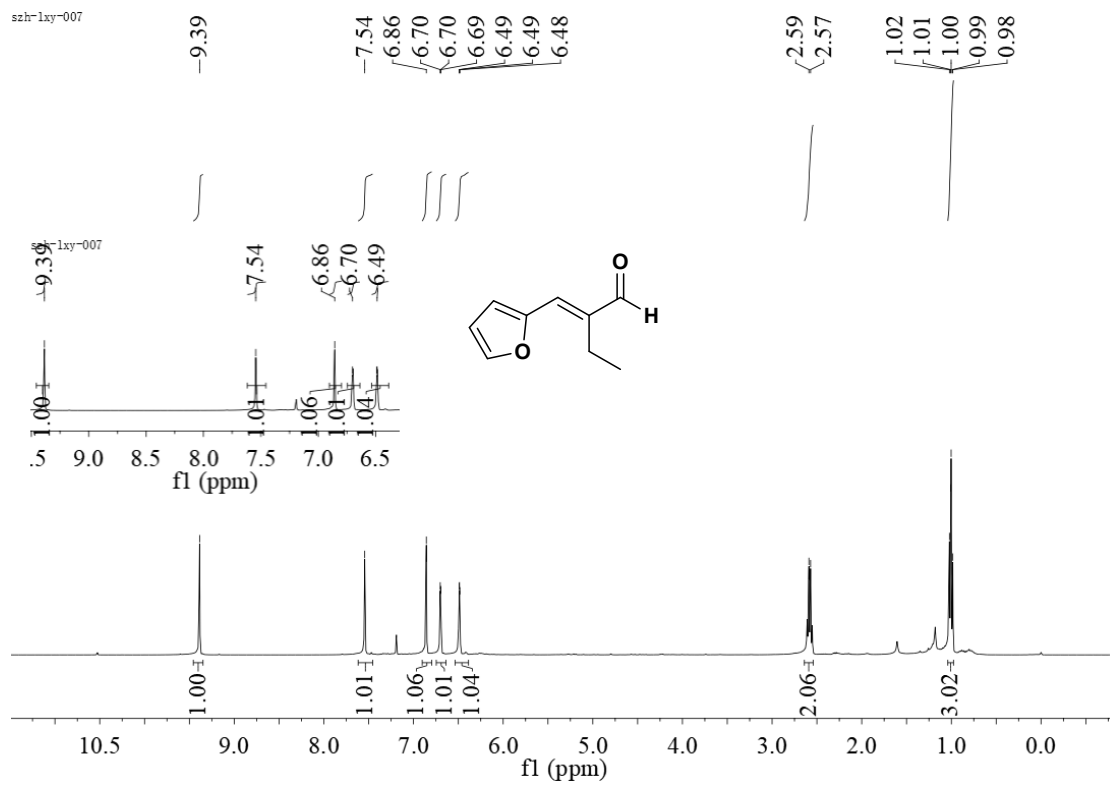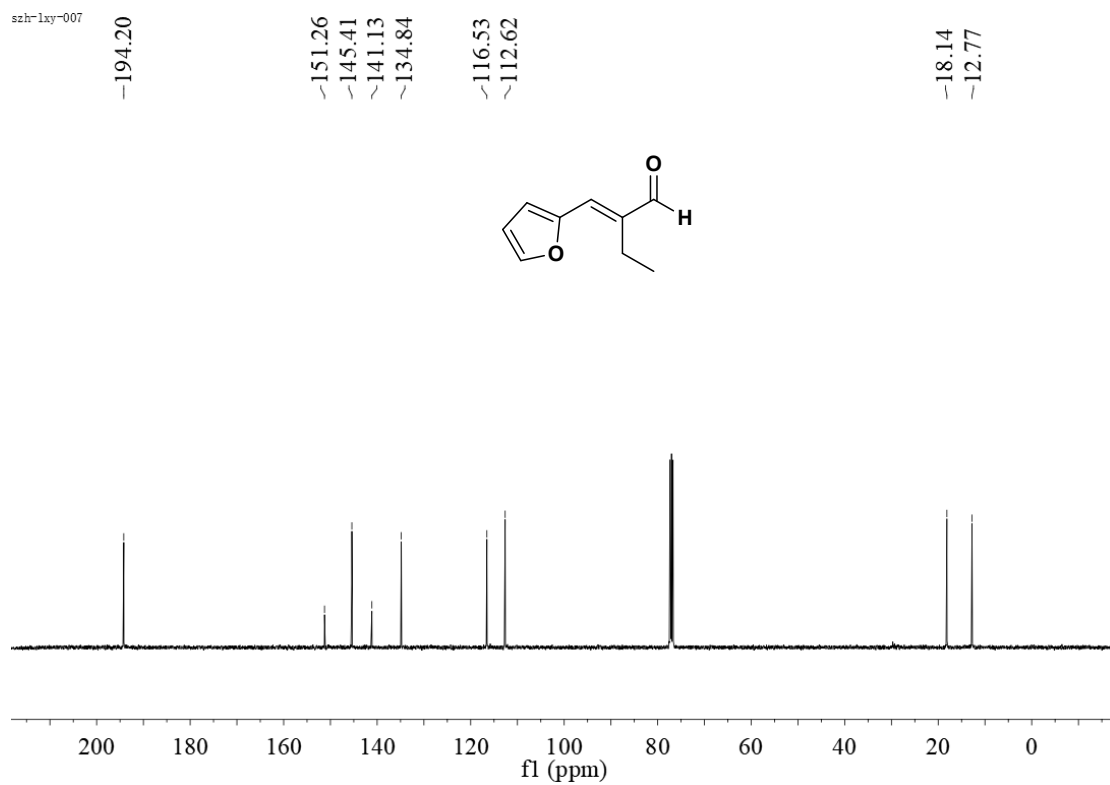

$^{13}\text{C}$  NMR-spectrum (101 MHz,  $\text{CDCl}_3$ ) of **5b**



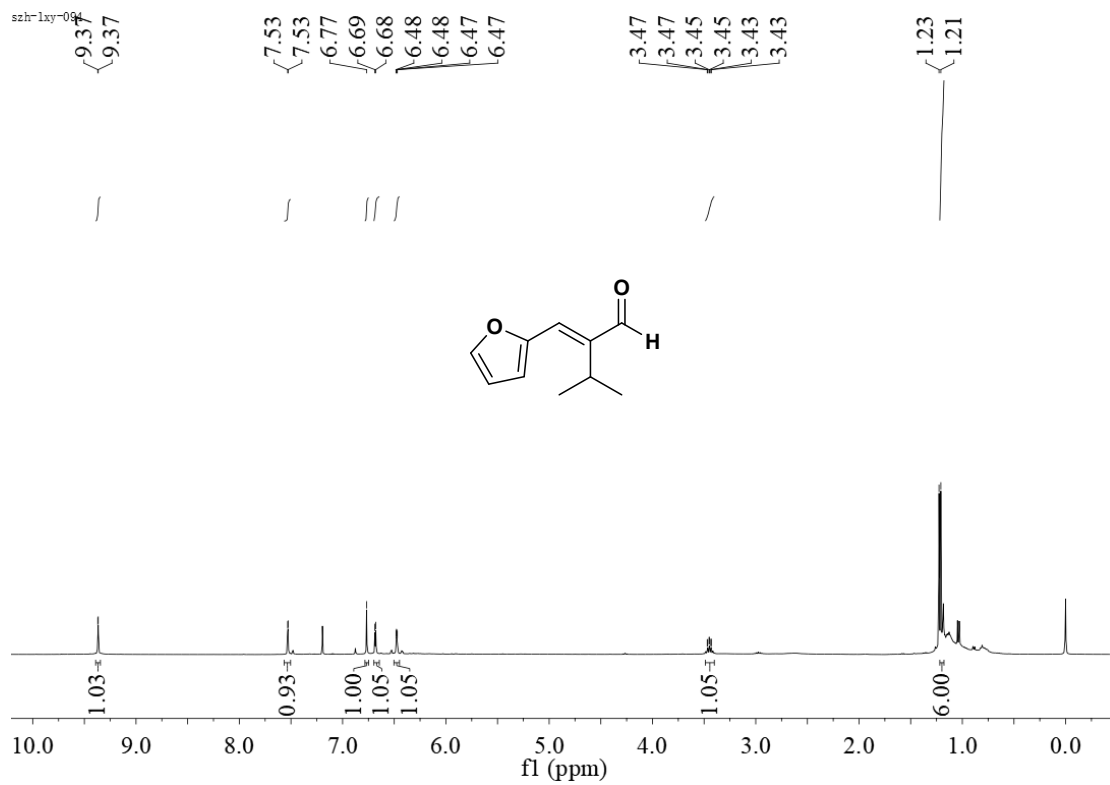

<sup>1</sup>H NMR-spectrum (400 MHz, CDCl<sub>3</sub>) of **5c**

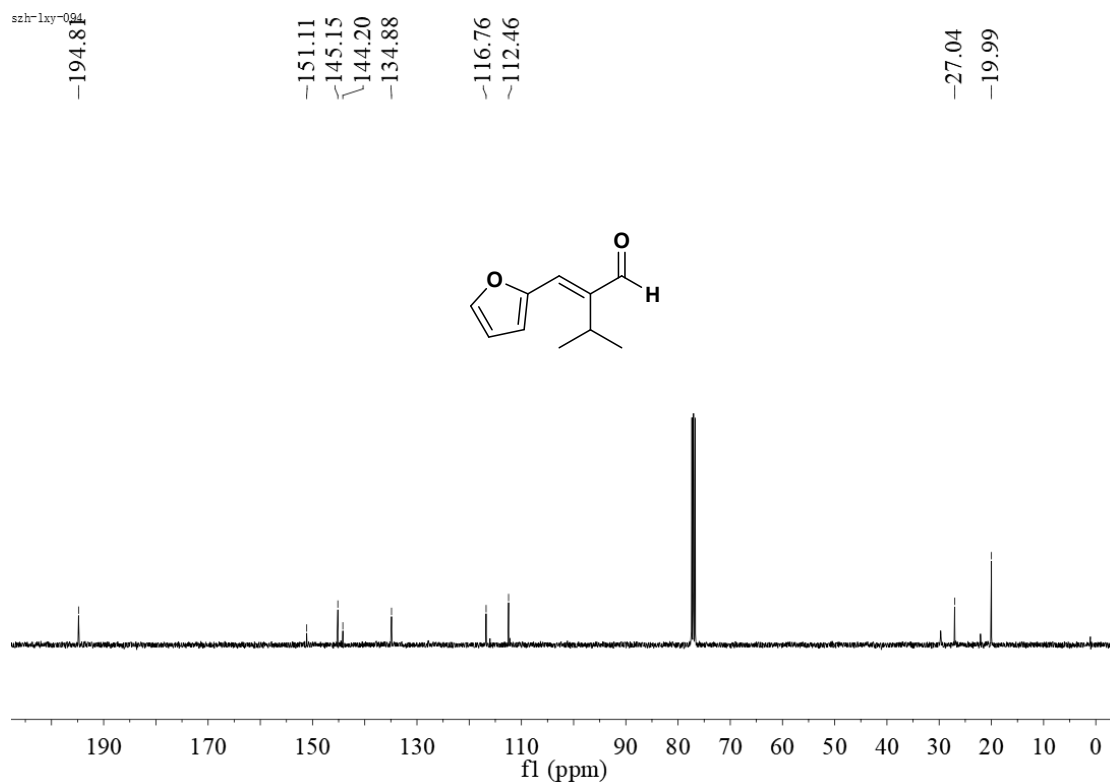

<sup>13</sup>C NMR-spectrum (101 MHz, CDCl<sub>3</sub>) of **5c**

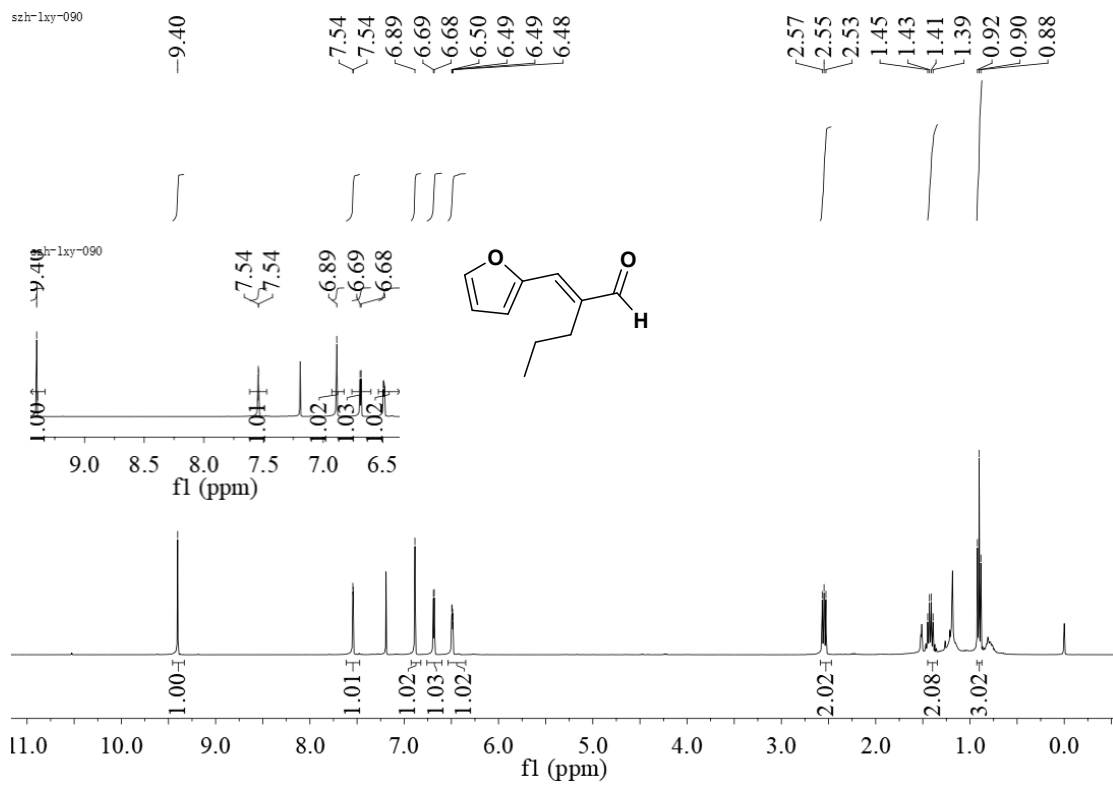

<sup>1</sup>H NMR-spectrum (400 MHz, CDCl<sub>3</sub>) of **5d**

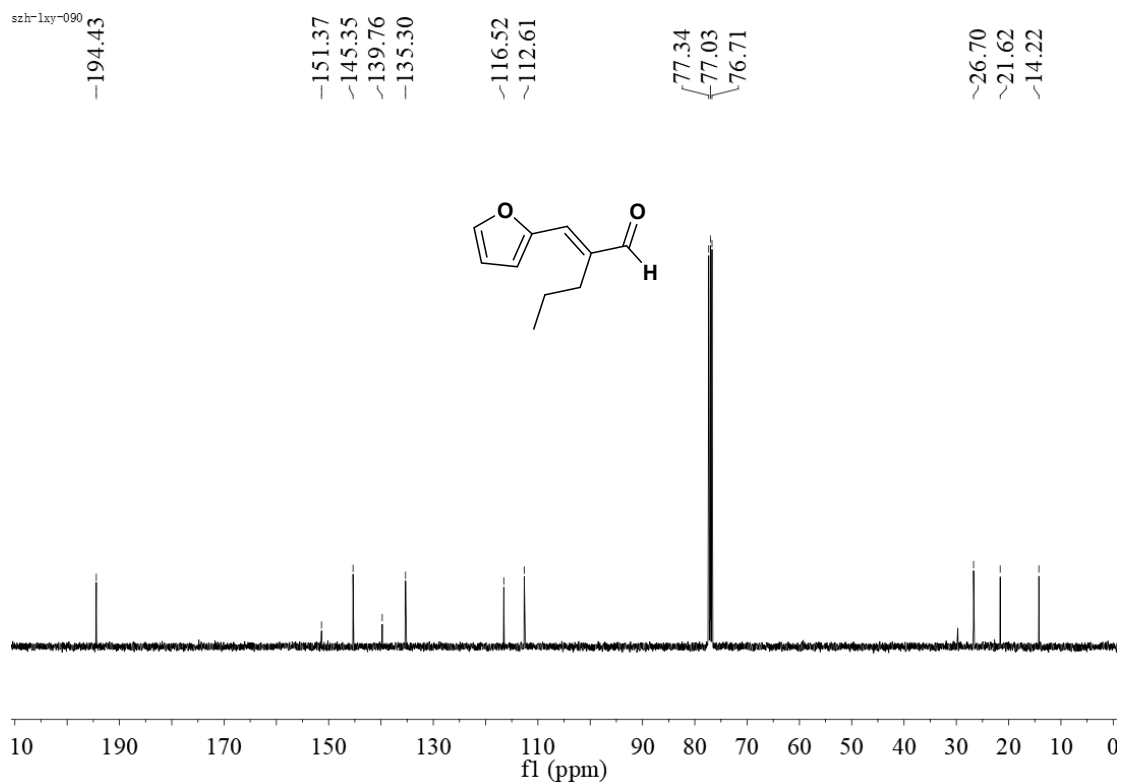

<sup>13</sup>C NMR-spectrum (101 MHz, CDCl<sub>3</sub>) of **5d**

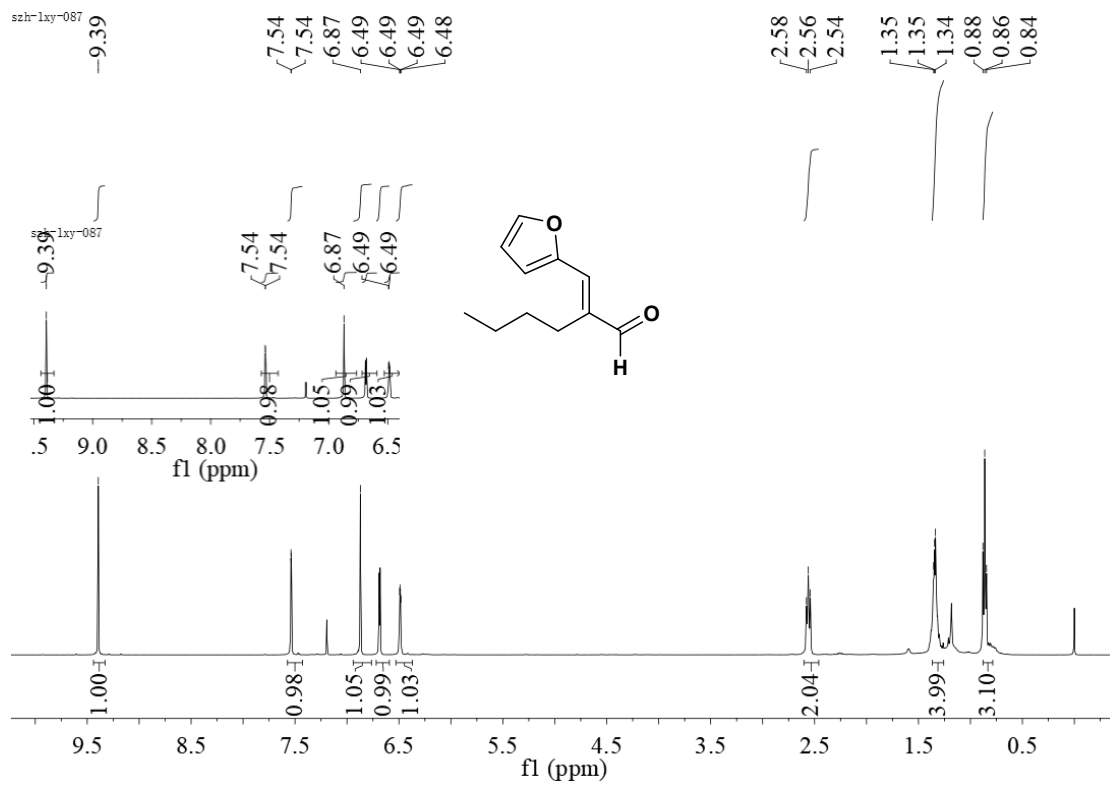

$^1\text{H}$  NMR-spectrum (400 MHz,  $\text{CDCl}_3$ ) of **5e**

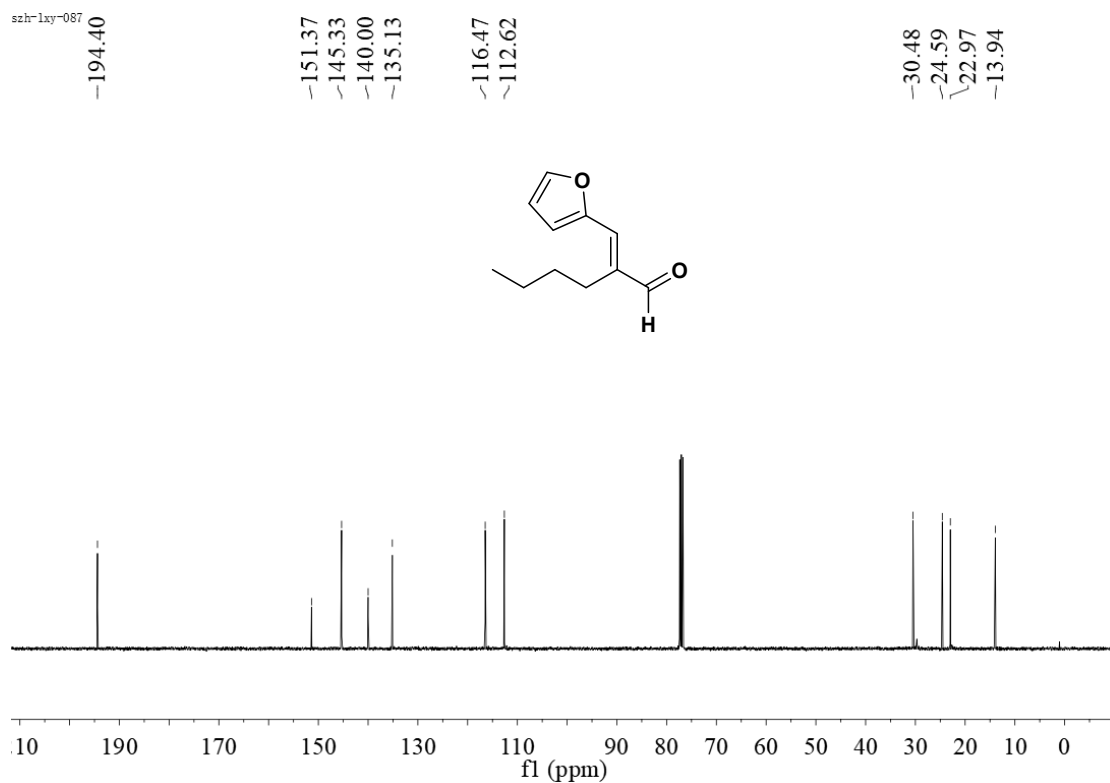

$^{13}\text{C}$  NMR-spectrum (101 MHz,  $\text{CDCl}_3$ ) of **5e**

szh-1xy-082

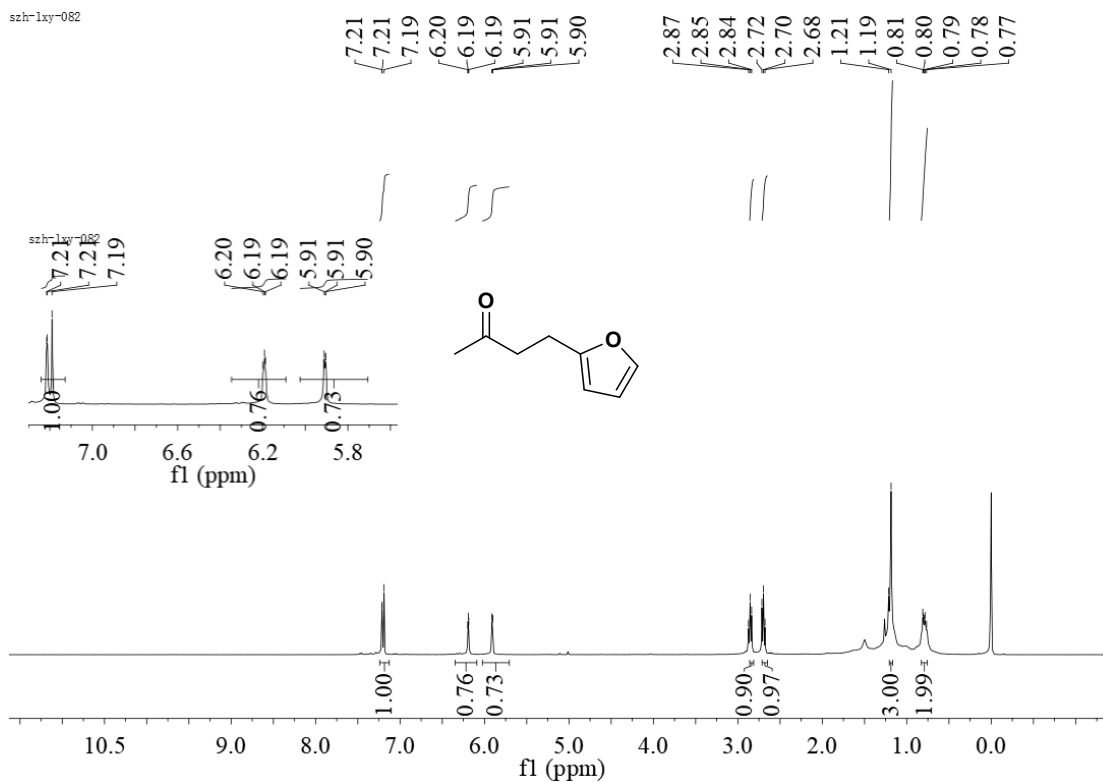

<sup>1</sup>H NMR-spectrum (400 MHz, CDCl<sub>3</sub>) of 7a

szh-1xy-082

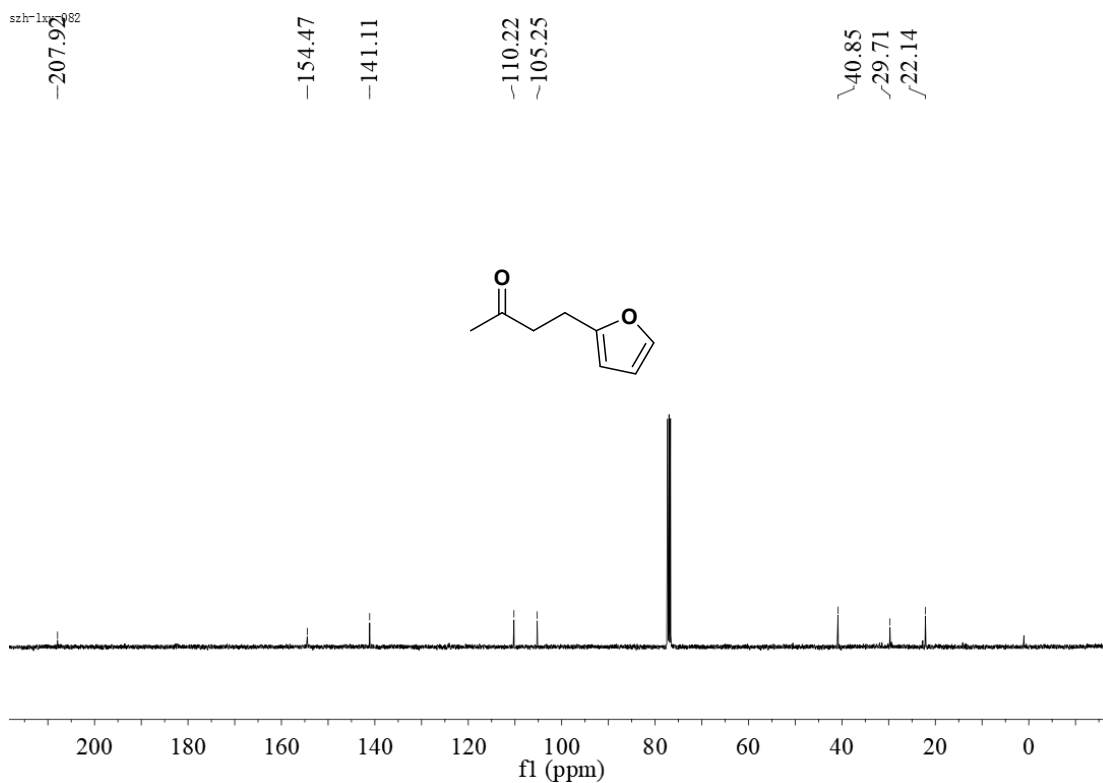

<sup>13</sup>C NMR-spectrum (101 MHz, CDCl<sub>3</sub>) of 7a

SZH-LXY-053

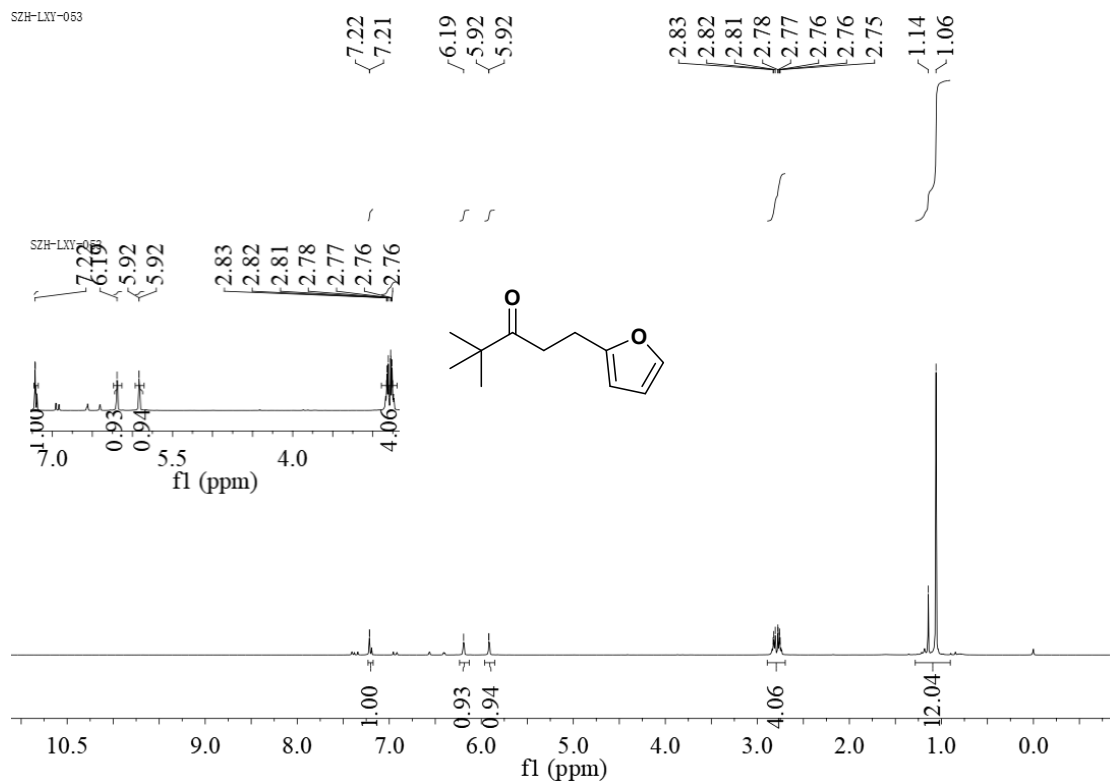

$^1\text{H}$  NMR-spectrum (400 MHz,  $\text{CDCl}_3$ ) of 7c

SZH-LXY-053

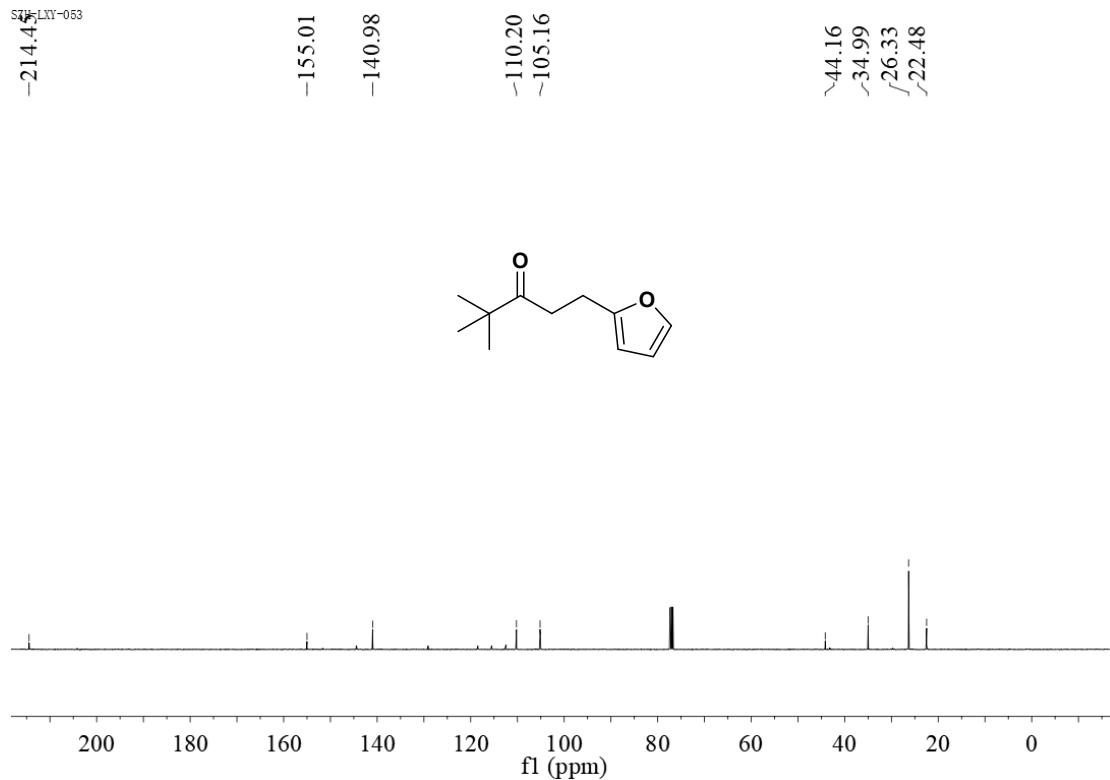

$^{13}\text{C}$  NMR-spectrum (101 MHz,  $\text{CDCl}_3$ ) of 7c

SZH-LVY-055

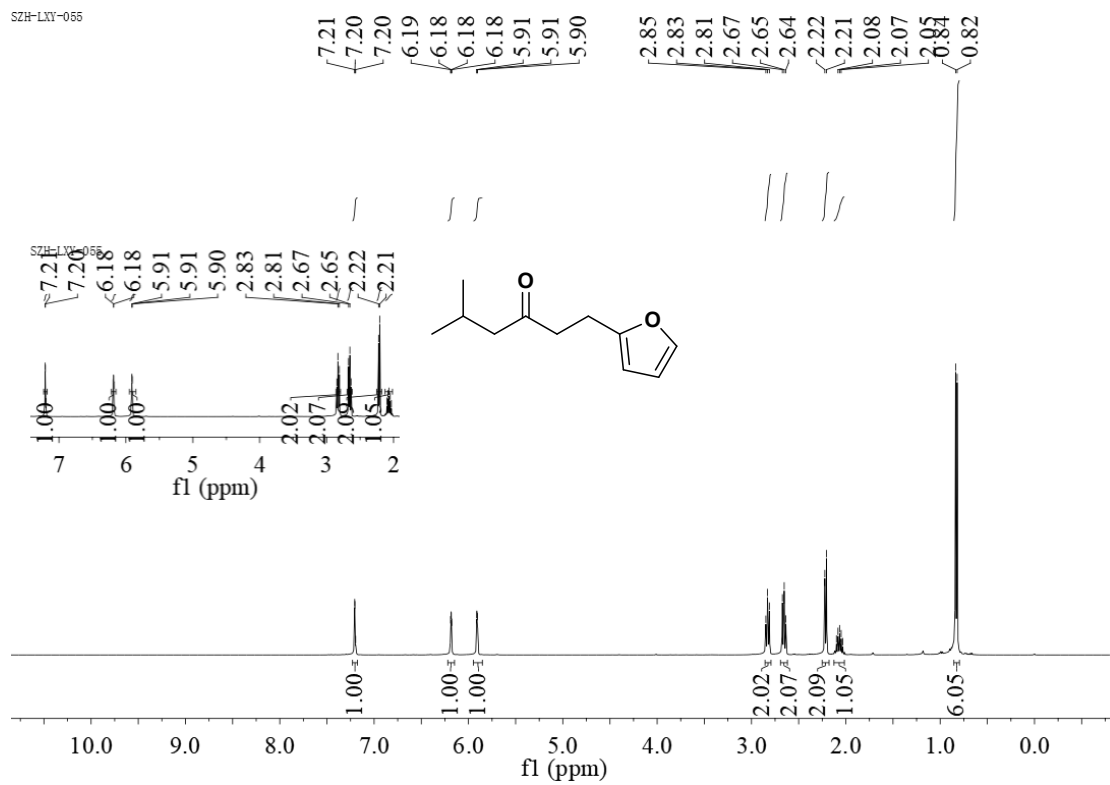

<sup>1</sup>H NMR-spectrum (400 MHz, CDCl<sub>3</sub>) of 7d

SZH-LVY-055

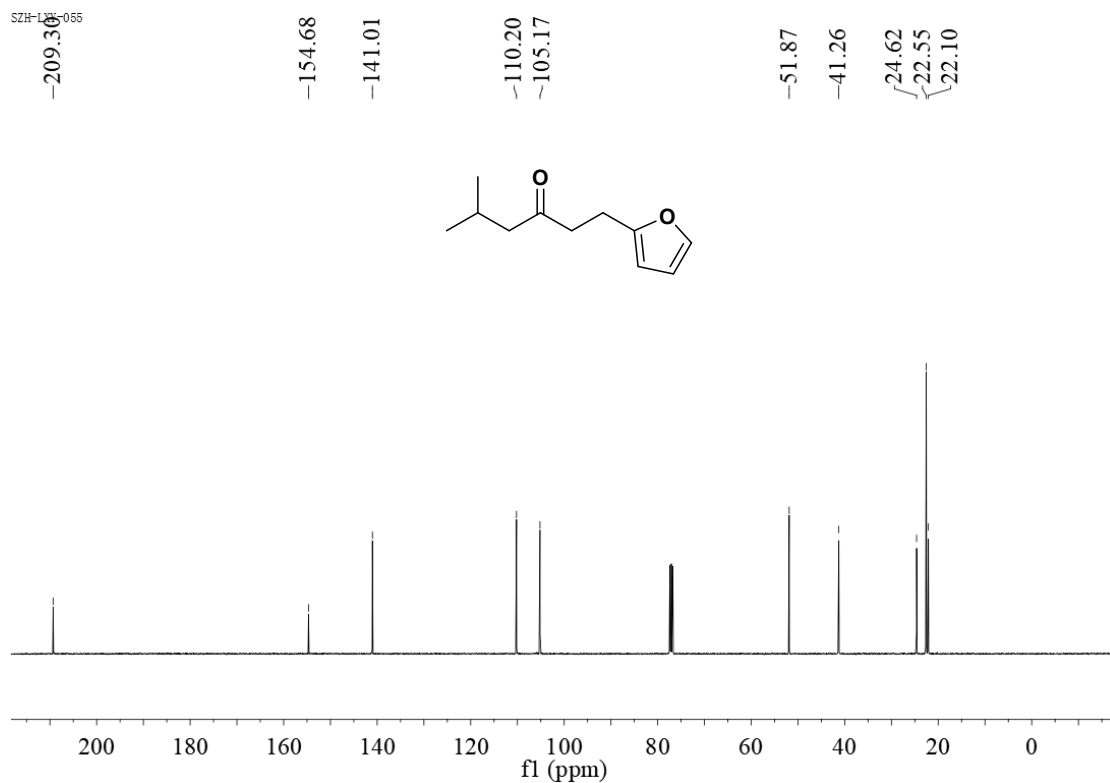

<sup>13</sup>C NMR-spectrum (101 MHz, CDCl<sub>3</sub>) of 7d

SZH-LXY-059

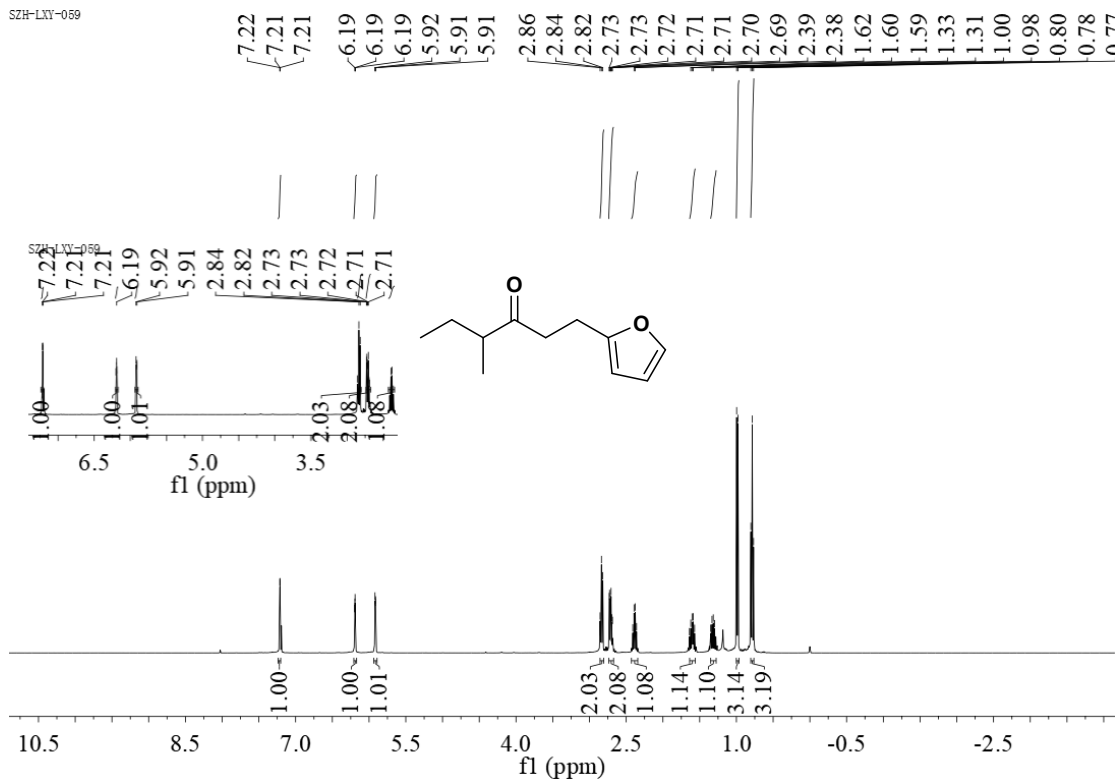

SZH-LXY-059

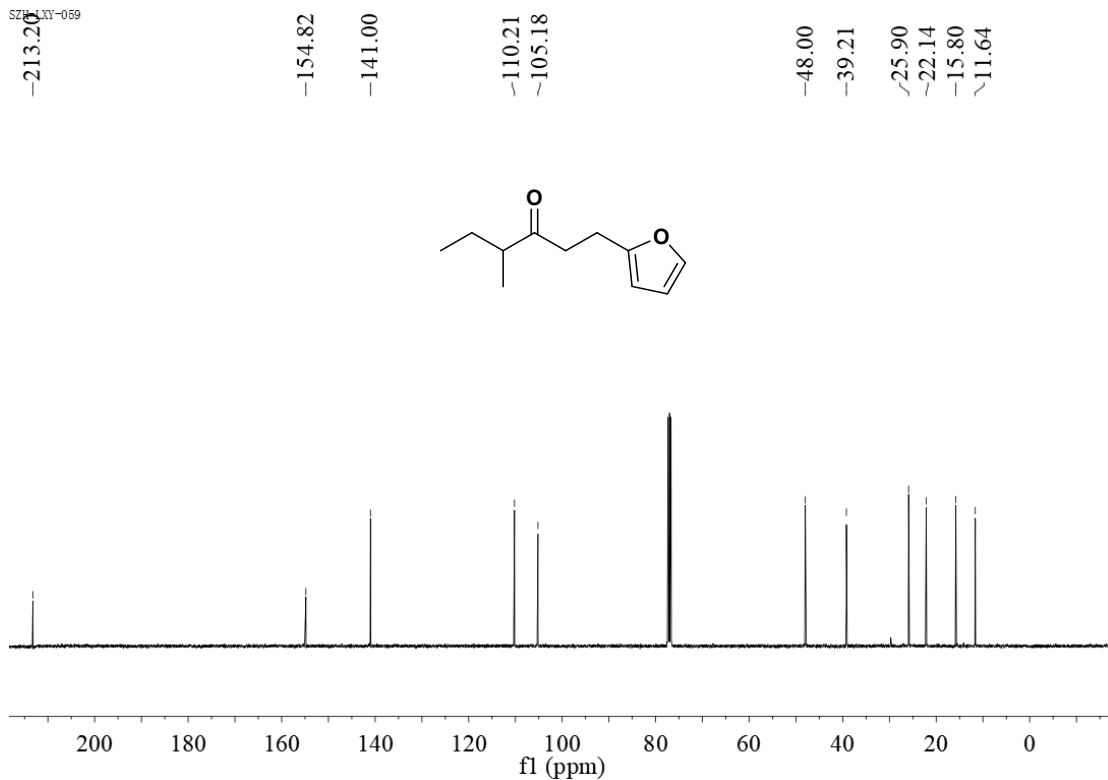

<sup>13</sup>C NMR-spectrum (101 MHz, CDCl<sub>3</sub>) of 7e

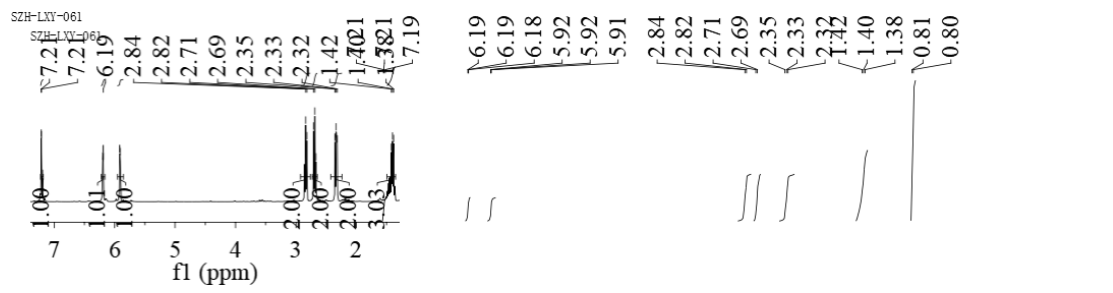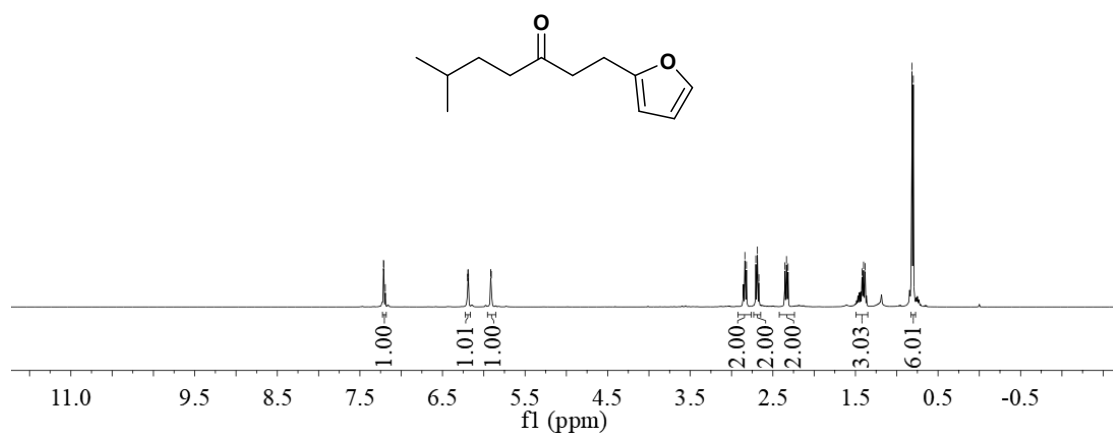

<sup>1</sup>H NMR-spectrum (400 MHz, CDCl<sub>3</sub>) of **7f**

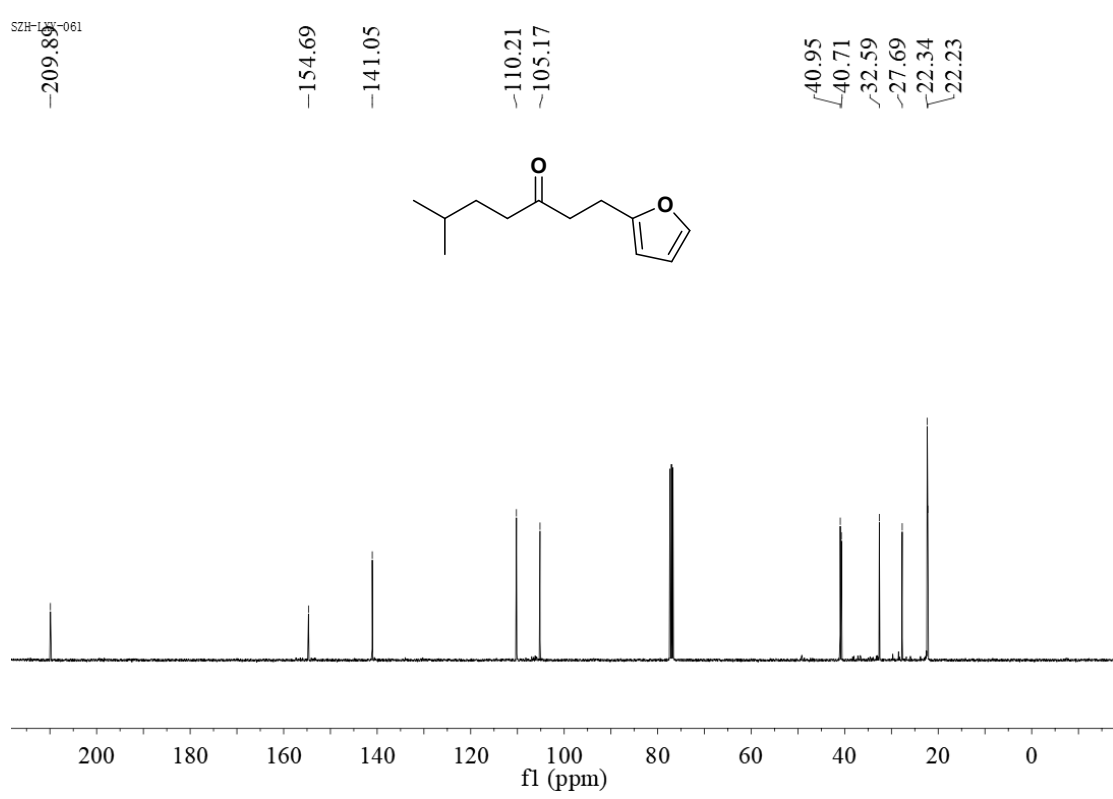

<sup>13</sup>C NMR-spectrum (101 MHz, CDCl<sub>3</sub>) of **7f**



szh-1xy-065

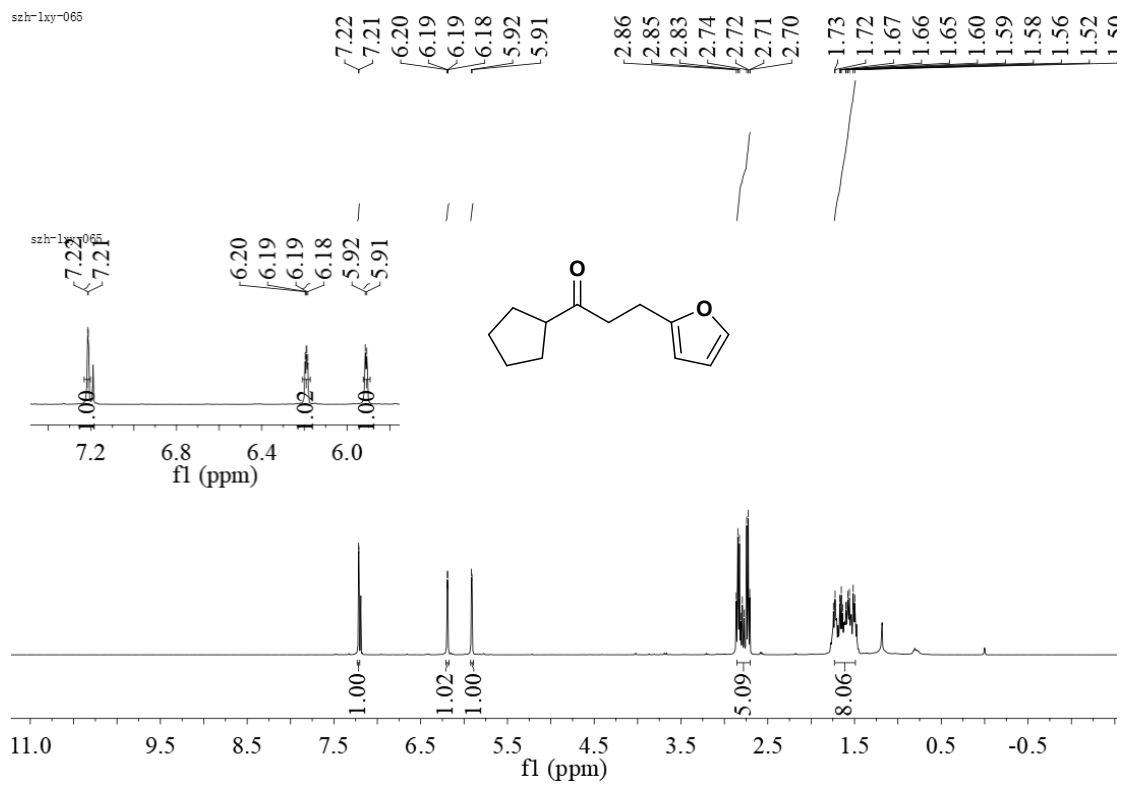

<sup>1</sup>H NMR-spectrum (400 MHz, CDCl<sub>3</sub>) of **7g**

szh-1xy-065

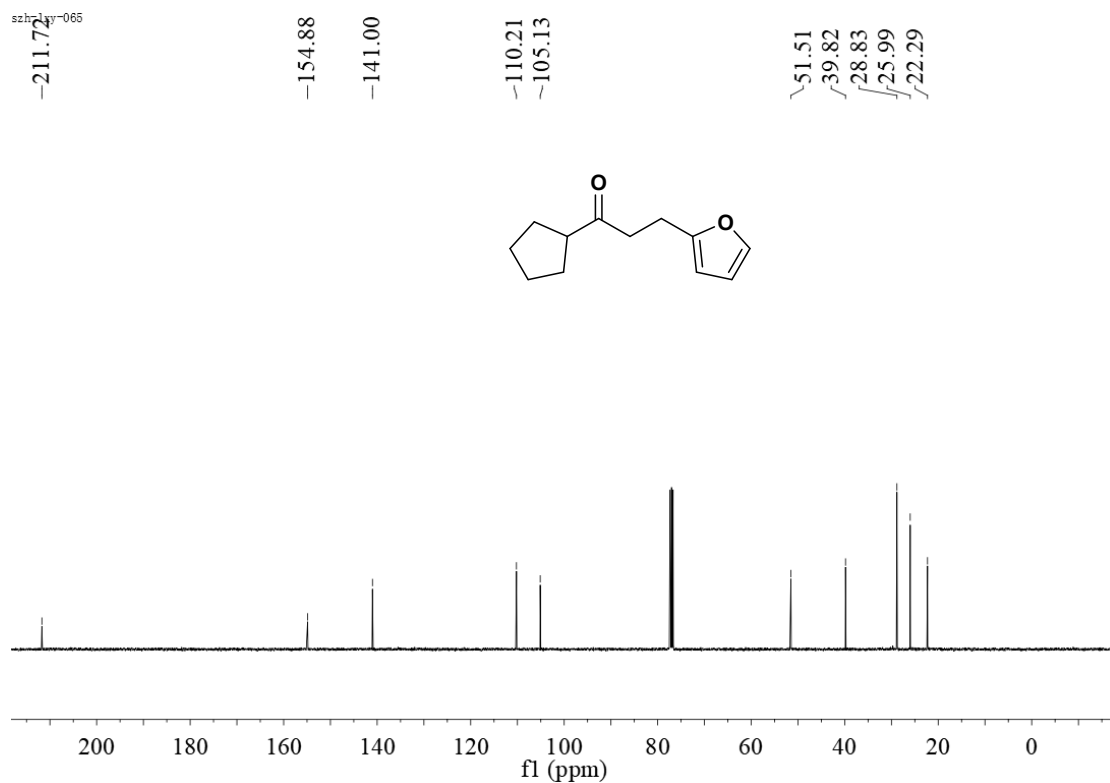

<sup>13</sup>C NMR-spectrum (101 MHz, CDCl<sub>3</sub>) of **7g**

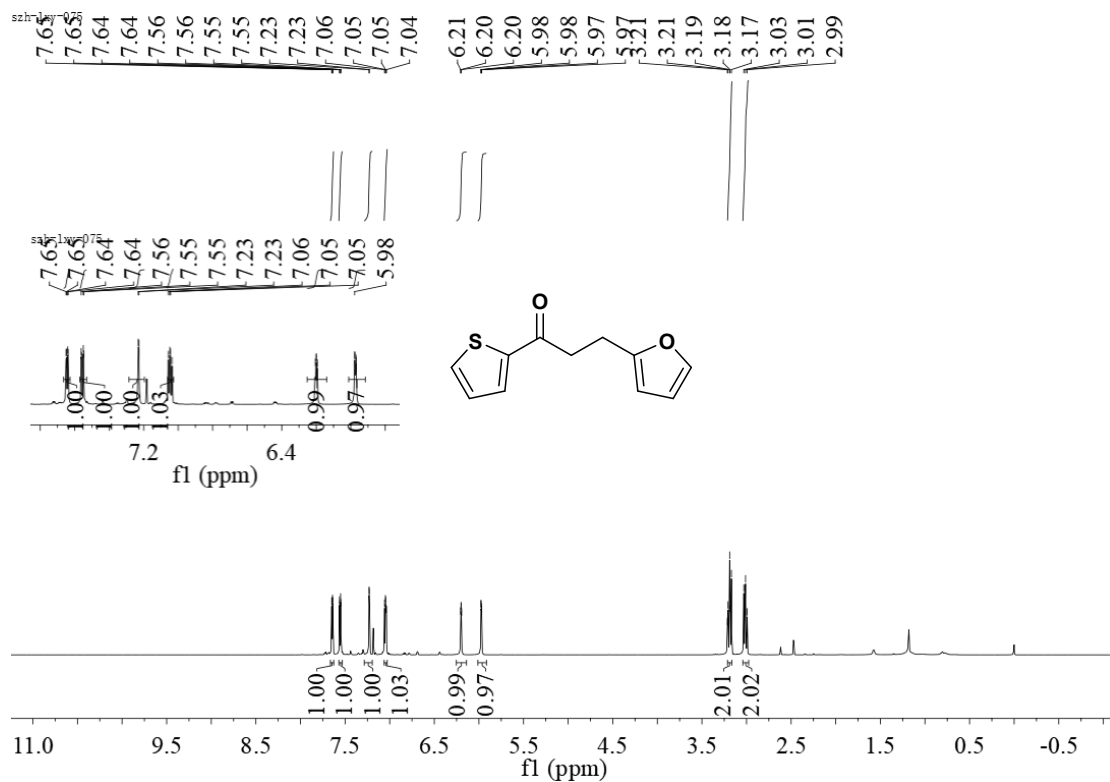

<sup>1</sup>H NMR-spectrum (400 MHz, CDCl<sub>3</sub>) of **7h**

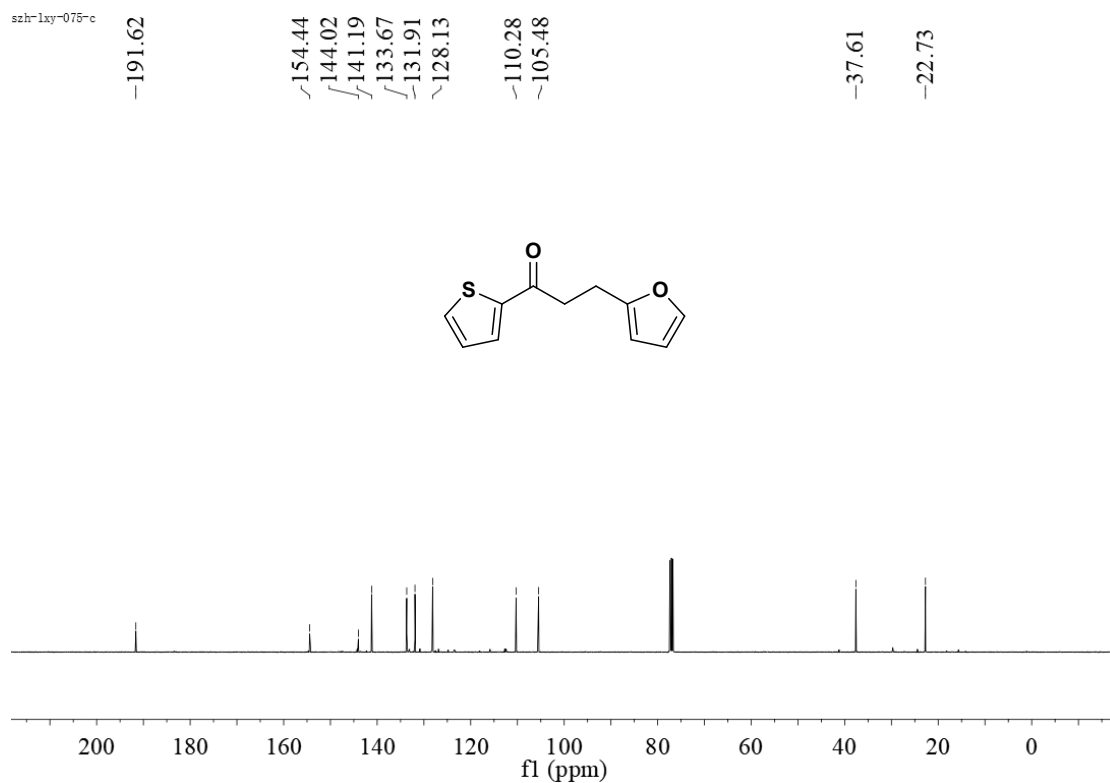

<sup>13</sup>C NMR-spectrum (101 MHz, CDCl<sub>3</sub>) of **7h**

szh-1xy-073

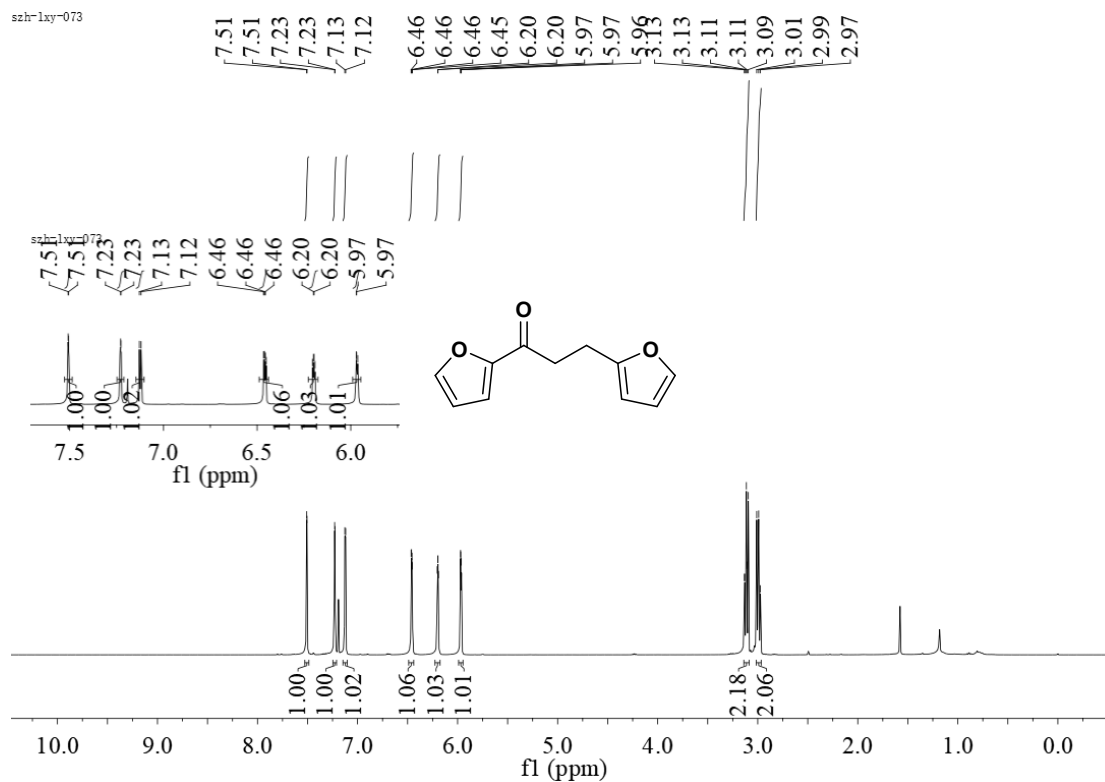

<sup>1</sup>H NMR-spectrum (400 MHz, CDCl<sub>3</sub>) of **7i**

szh-1xy-073

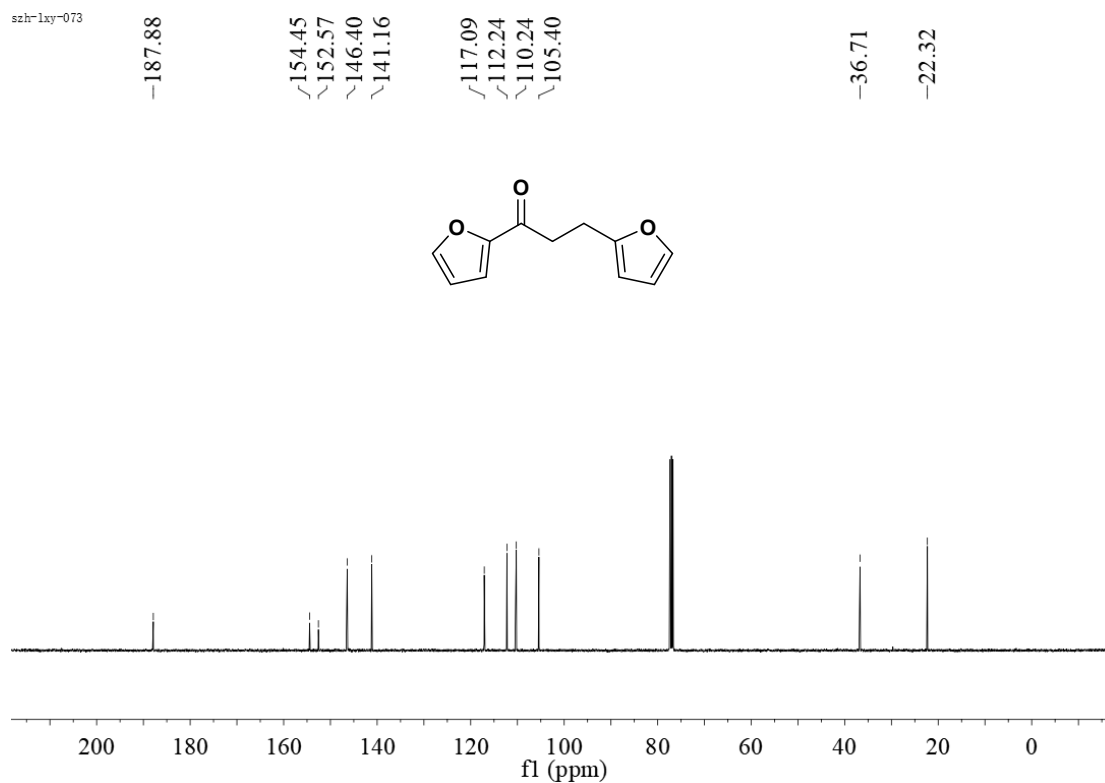

<sup>13</sup>C NMR-spectrum (101 MHz, CDCl<sub>3</sub>) of **7i**

SZH-LXY-058

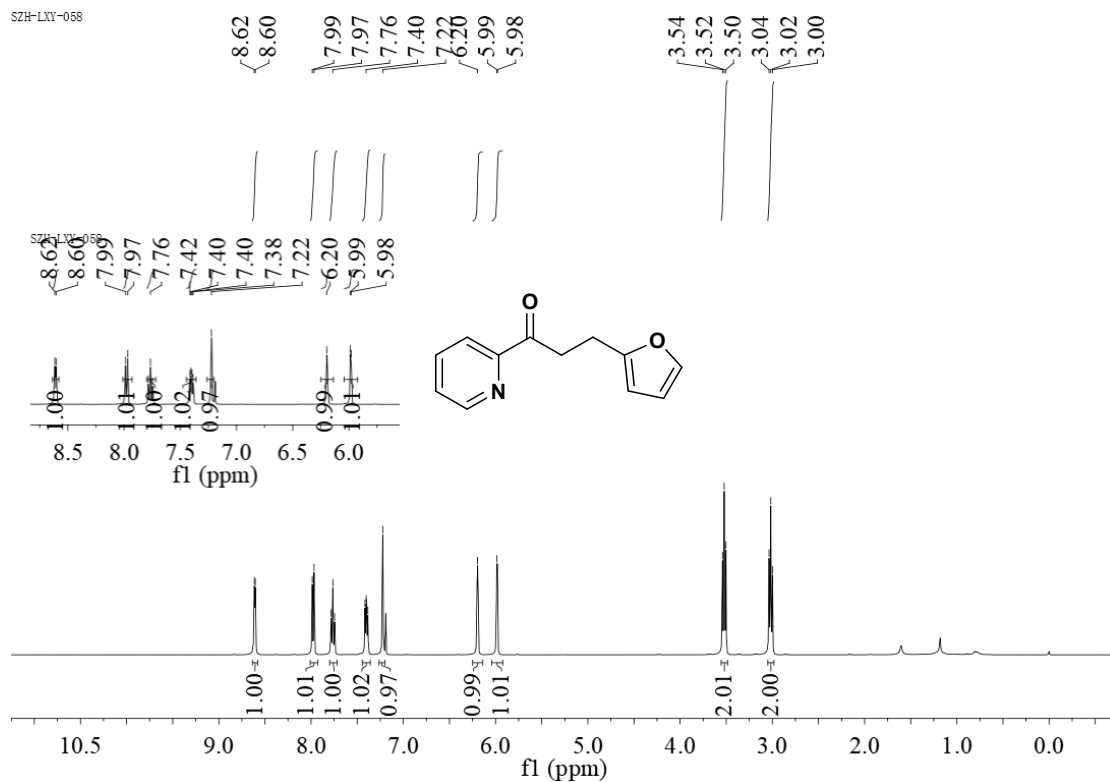

<sup>1</sup>H NMR-spectrum (400 MHz, CDCl<sub>3</sub>) of 7j

SZH-LXY-058

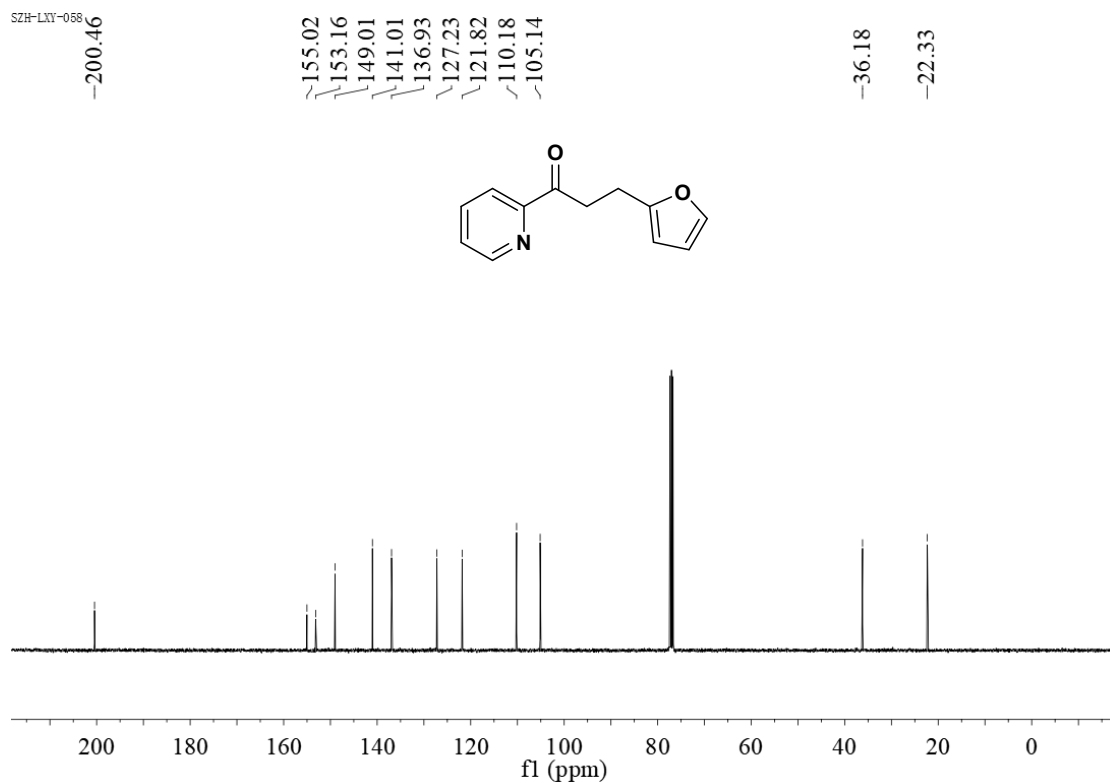

<sup>13</sup>C NMR-spectrum (101 MHz, CDCl<sub>3</sub>) of 7j

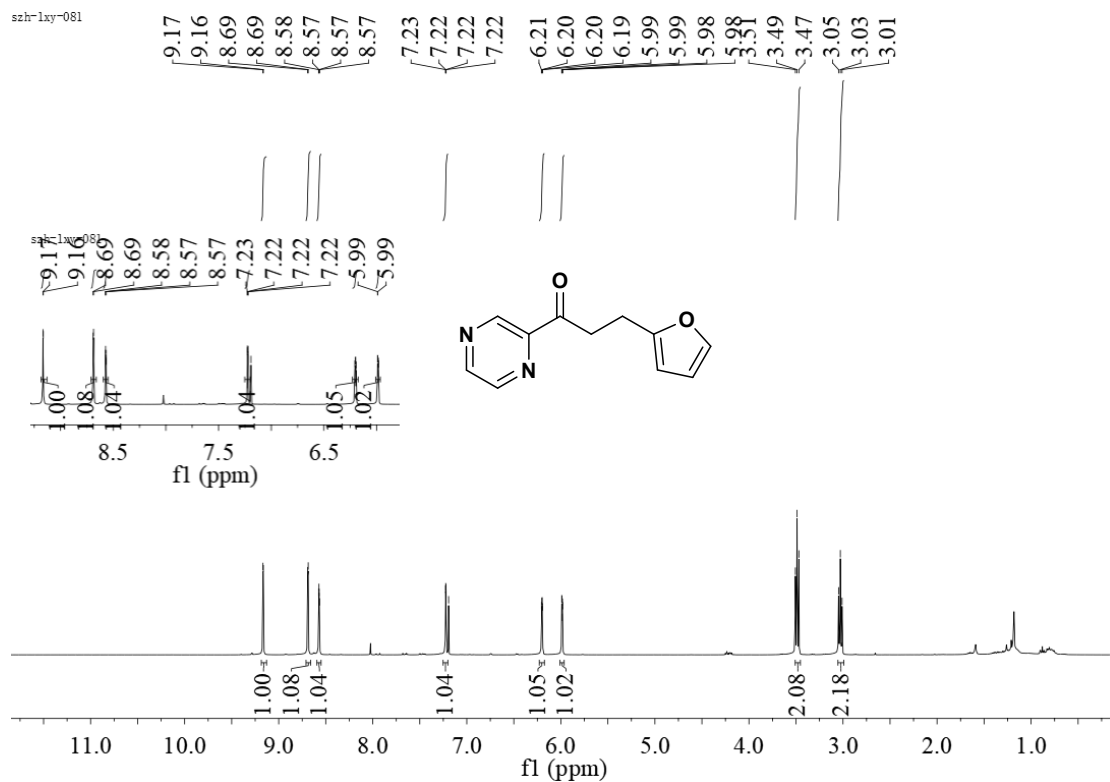

$^1\text{H}$  NMR-spectrum (400 MHz,  $\text{CDCl}_3$ ) of 7k

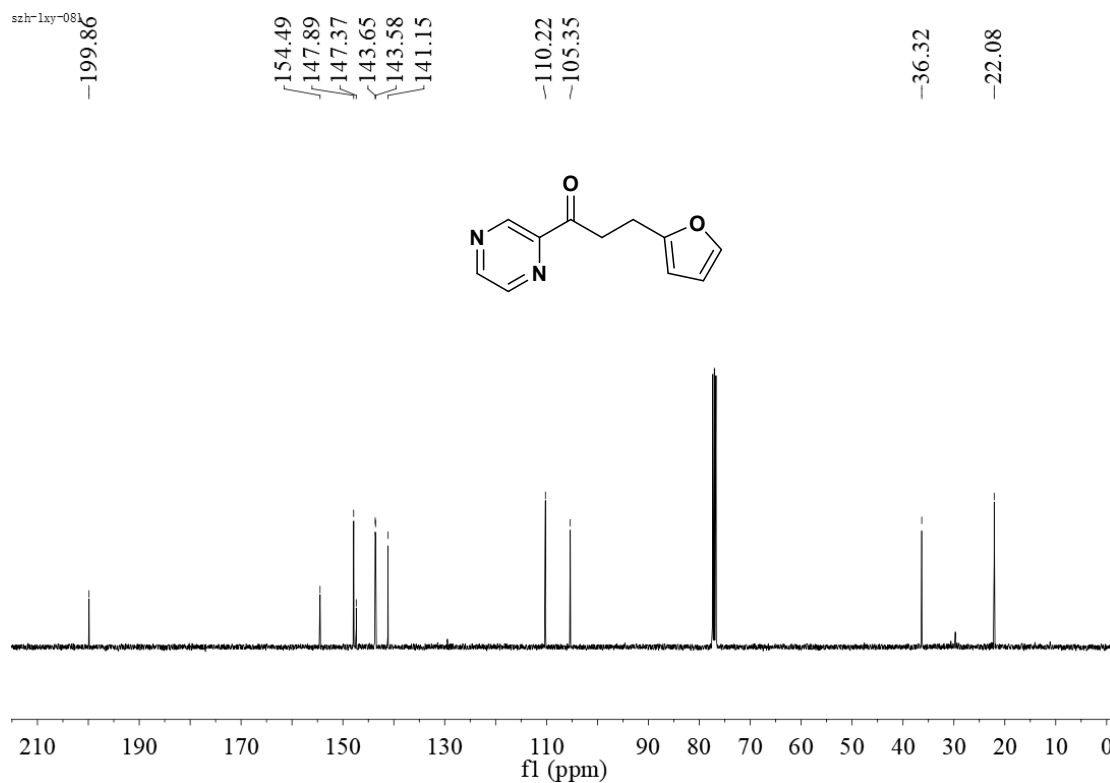

$^{13}\text{C}$  NMR-spectrum (101 MHz,  $\text{CDCl}_3$ ) of 7k

szh-1xy-084

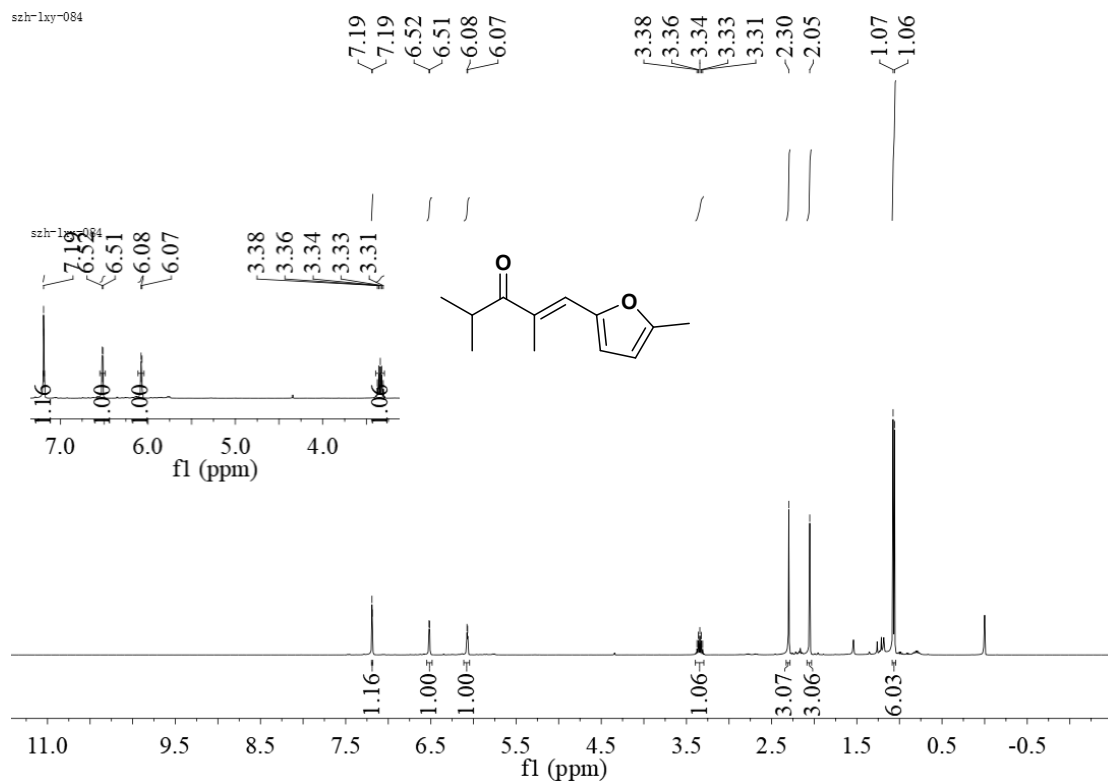

$^1\text{H}$  NMR-spectrum (400 MHz,  $\text{CDCl}_3$ ) of **8a**

szh-1xy-084

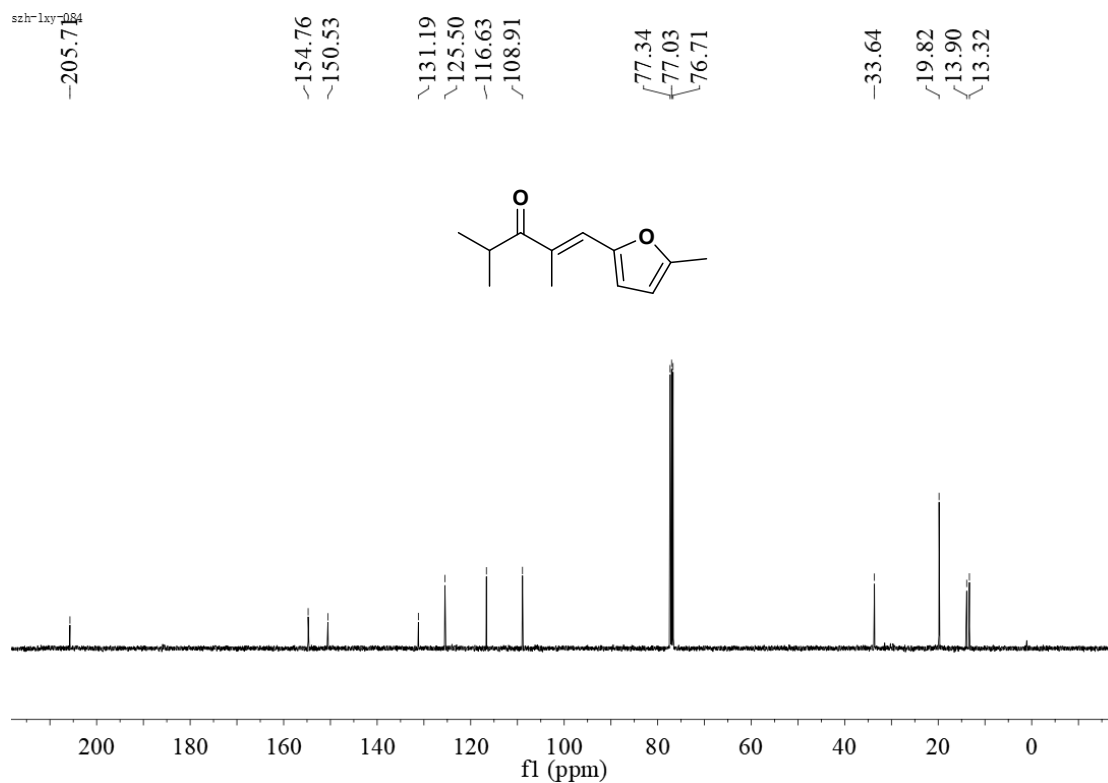

$^{13}\text{C}$  NMR-spectrum (101 MHz,  $\text{CDCl}_3$ ) of **8a**

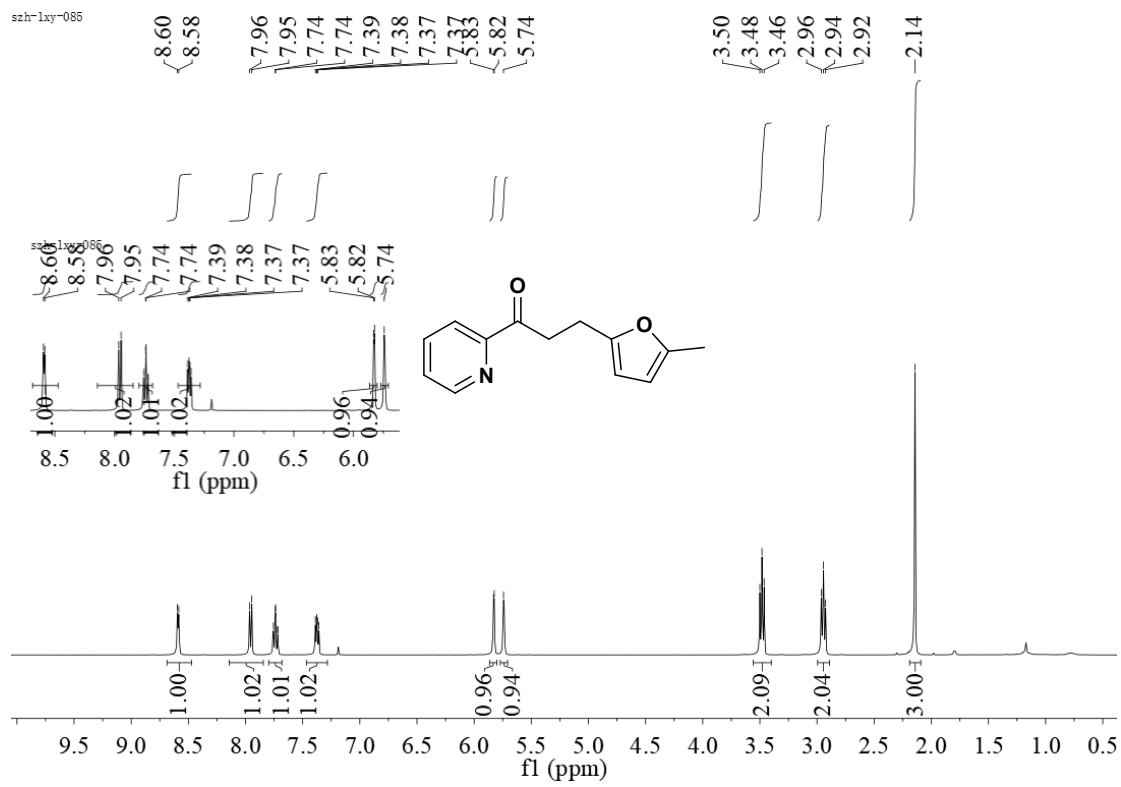

<sup>1</sup>H NMR-spectrum (400 MHz, CDCl<sub>3</sub>) of **8c**

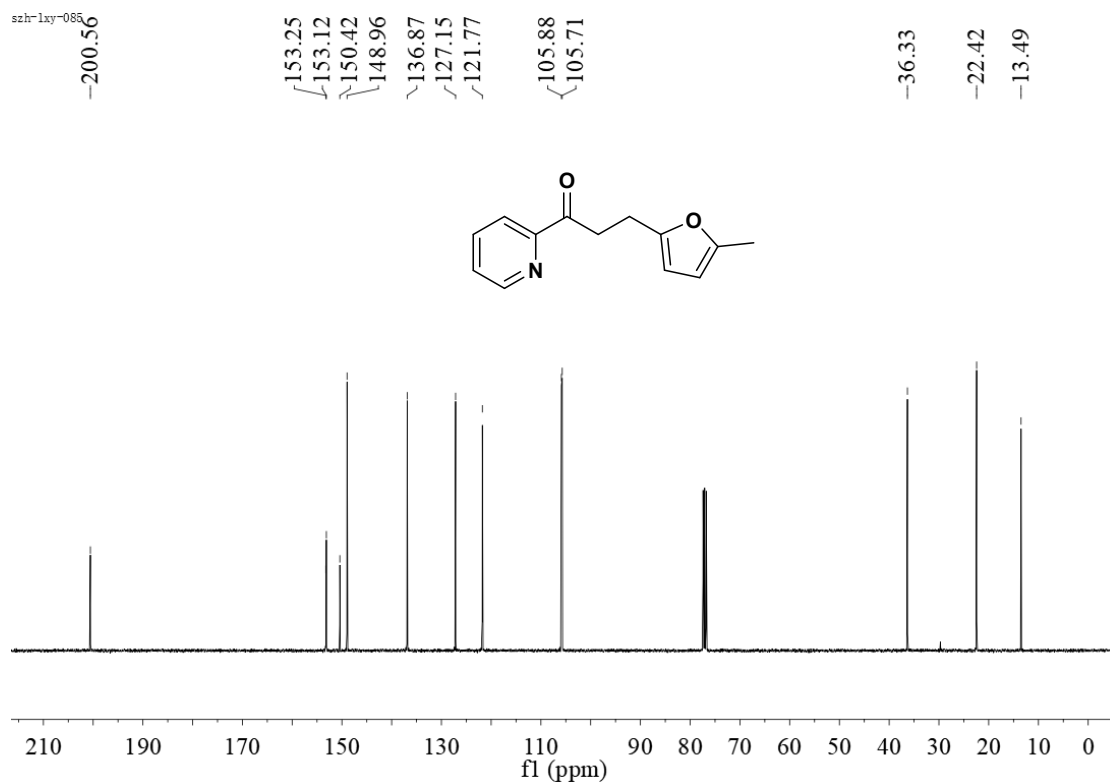

<sup>13</sup>C NMR-spectrum (101 MHz, CDCl<sub>3</sub>) of **8c**
